# Supplementary material for: Claulansine F–Donepezil Hybrids as Anti-Alzheimer’s Disease Agents with Cholinergic, Free-Radical Scavenging, and Neuroprotective Activities
Source: PubMed Central journal article supplement (PMC7957565; doi:10.3390/molecules26051303), 2021-02-28
Supplement: molecules-26-01303-s001.pdf [file molecules-26-01303-s001.pdf]

# **Claulansine F-Donepezil hybrids as anti-Alzheimer's disease agents with cholinergic, free radical scavenging, and neuroprotective activities**

Yingda Zang†, Ke Liu†, Weiping Wang, Chuangjun Li, Jie Ma, Jingzhi Yang, Xinyi Chen, Xiaoliang Wang, Dongming Zhang\*

## **Supplementary Materials**

State Key Laboratory of Bioactive Substance and Function of Natural Medicines, Institute of Materia Medica, Chinese Academy of Medical Sciences and Peking Union Medical College, Beijing, 100050, China;

\* Correspondence: zhangdm@imm.ac.cn; Tel./Fax: +86-10-63165227

† These authors contributed equally to this work.

### **Table of Contents**

|                                                                              |      |
|------------------------------------------------------------------------------|------|
| 1. <sup>1</sup> H NMR and <sup>13</sup> C NMR spectra of all final compounds | 2-27 |
| 2. HPLC analysis of all final compounds                                      | 28   |

# 1. <sup>1</sup>H NMR and <sup>13</sup>C NMR spectra of all final compounds

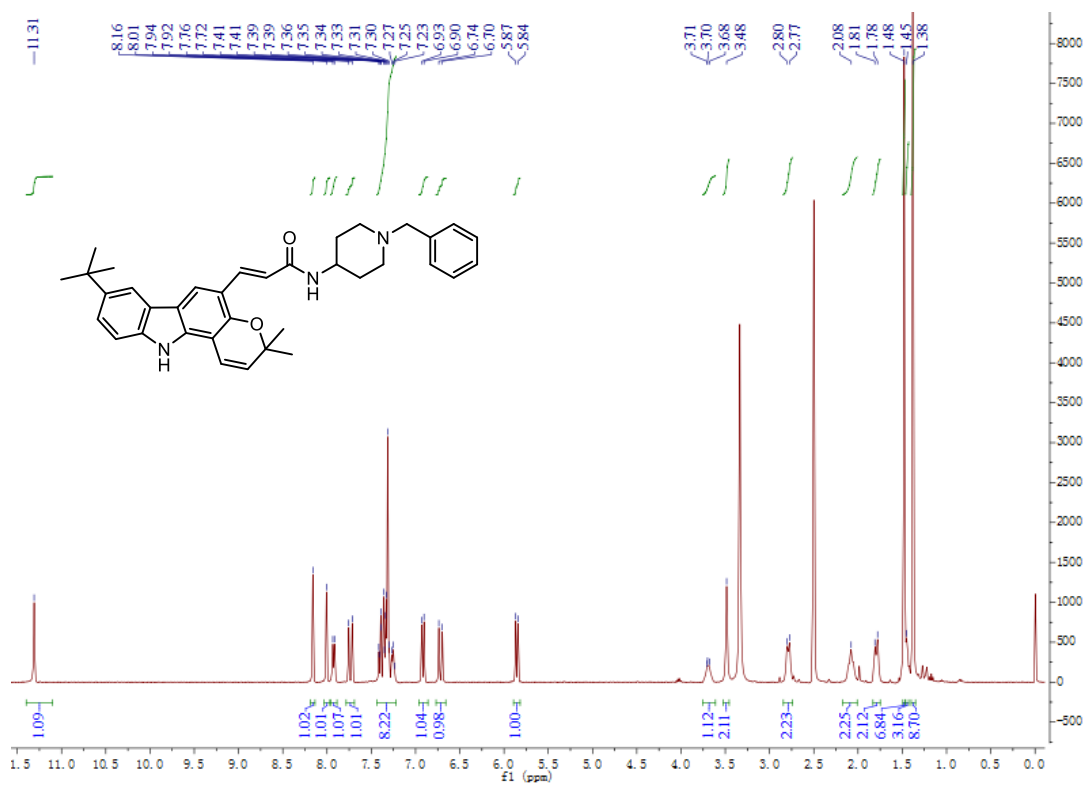

<sup>1</sup>H NMR (DMSO, 400 MHz) Spectrum of Compound 6aa

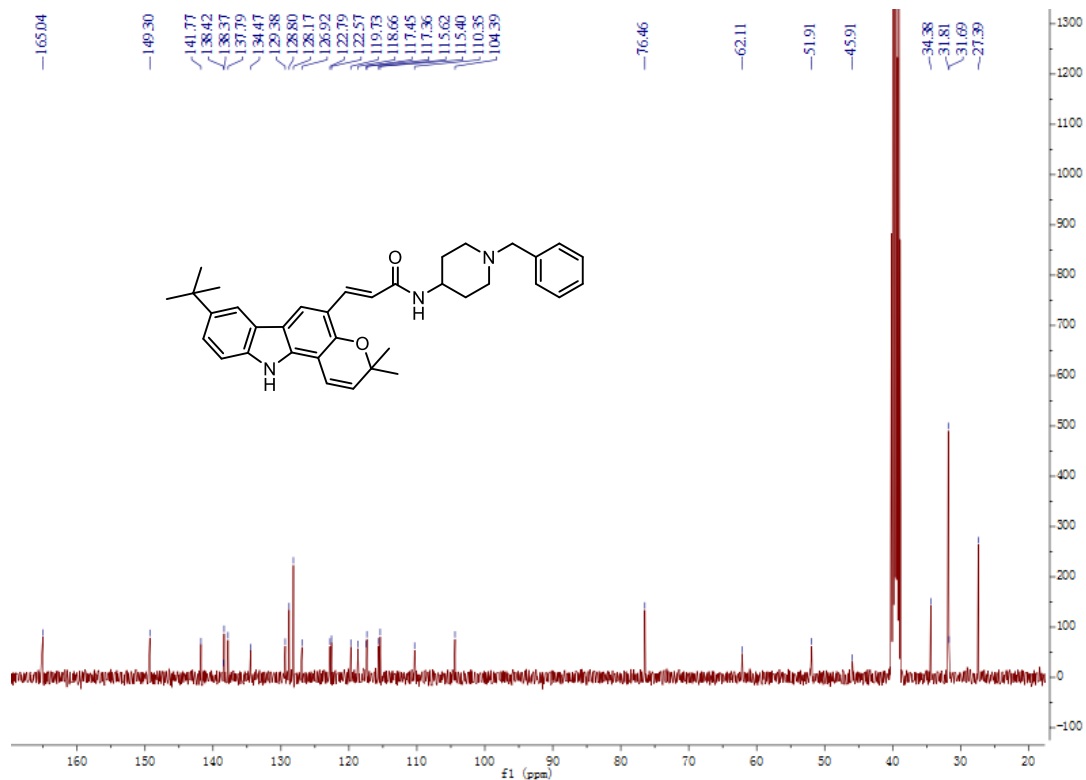

$^{13}\text{C}$  NMR (DMSO, 400 MHz) Spectrum of Compound 6aa

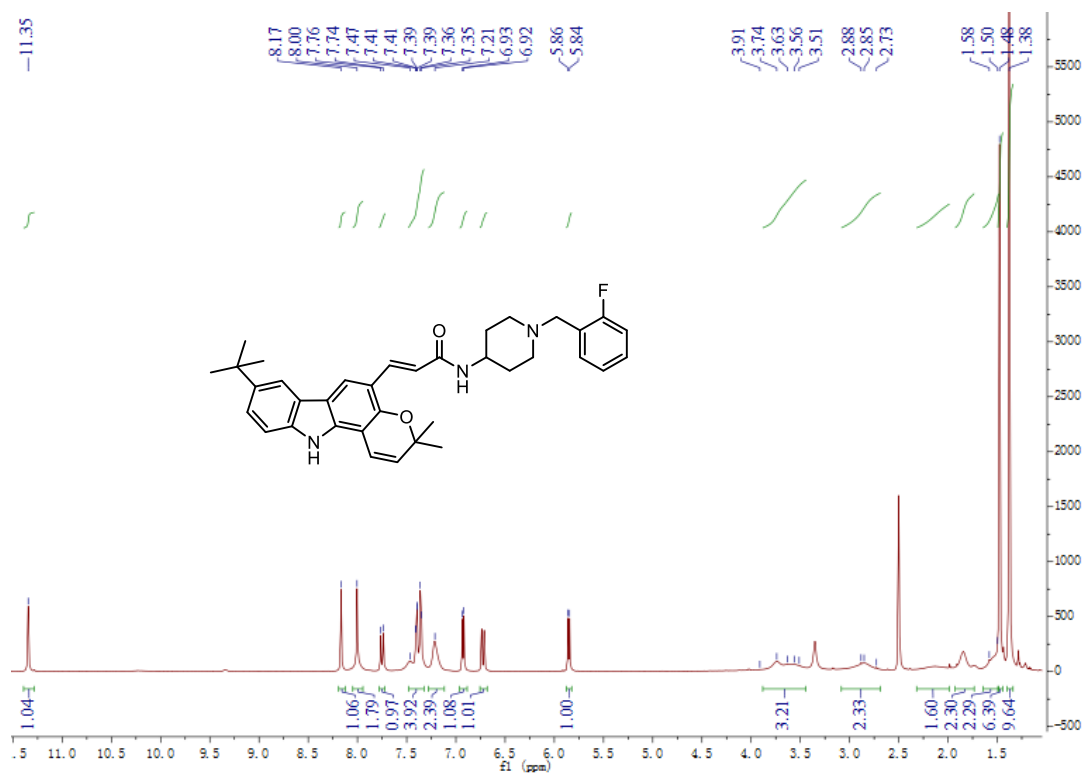

$^1\text{H}$  NMR (DMSO, 400 MHz) Spectrum of Compound 6ab

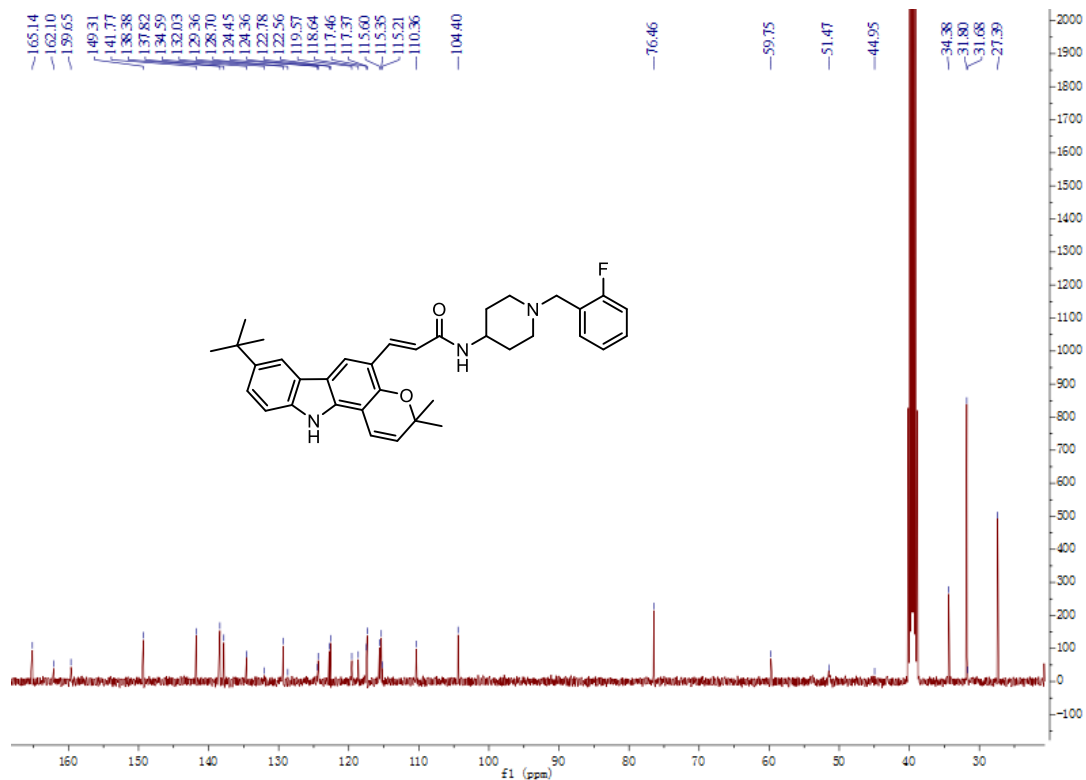

<sup>13</sup>C NMR (DMSO, 400 MHz) Spectrum of Compound 6ab

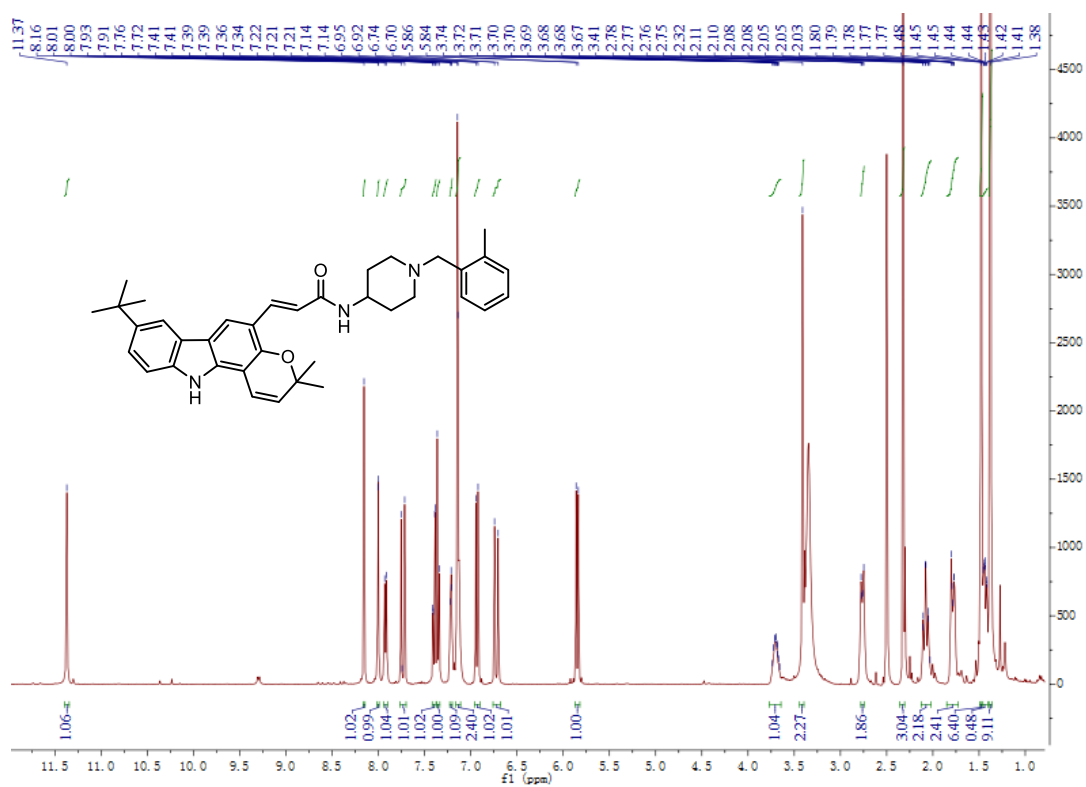

<sup>1</sup>H NMR (DMSO, 400 MHz) Spectrum of Compound 6ac

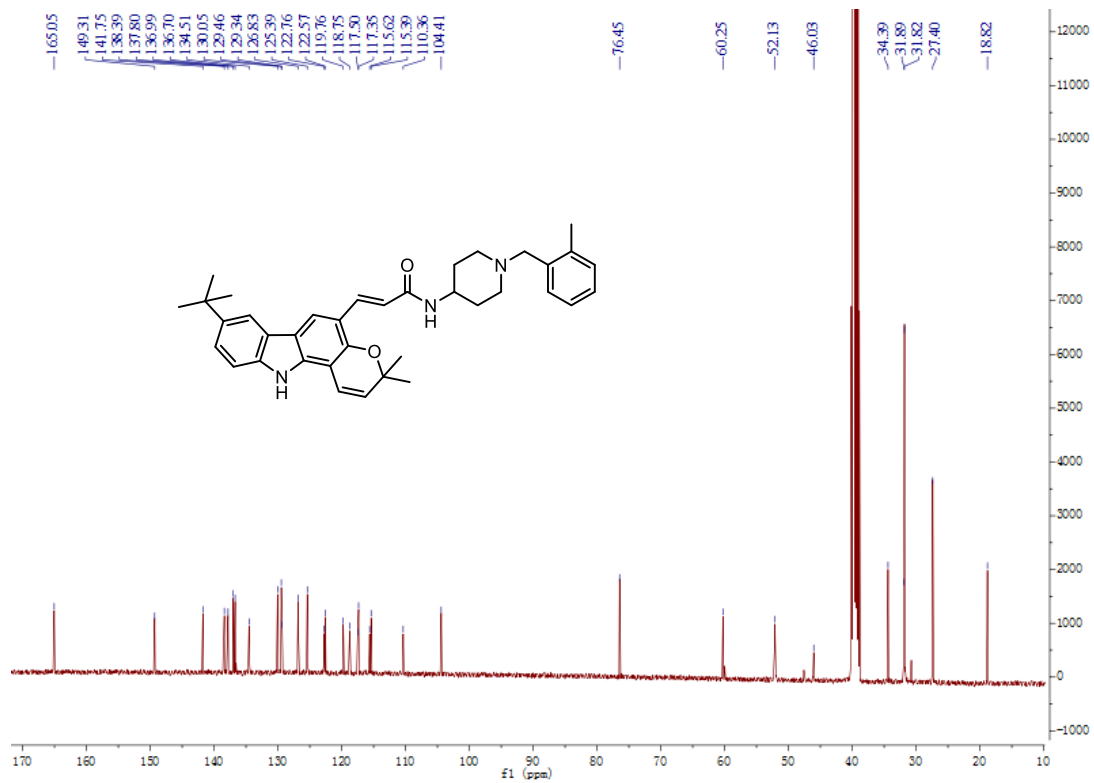

<sup>13</sup>C NMR (DMSO, 400 MHz) Spectrum of Compound 6ac

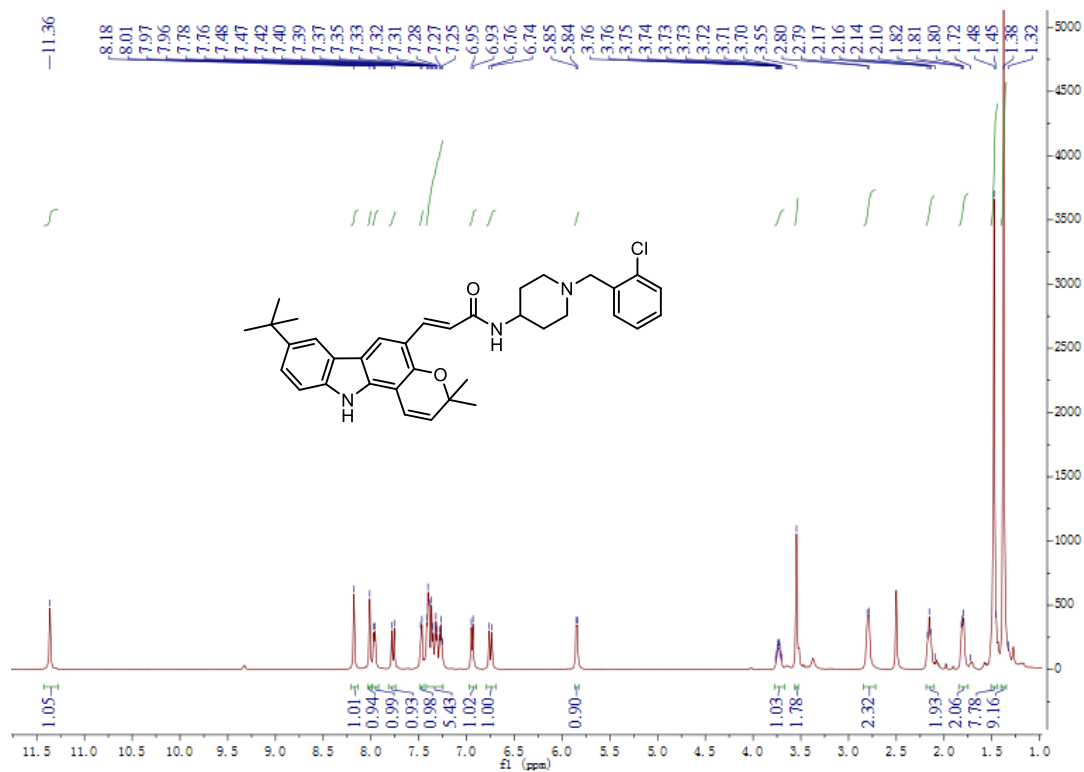

<sup>1</sup>H NMR (DMSO, 400 MHz) Spectrum of Compound 6ad

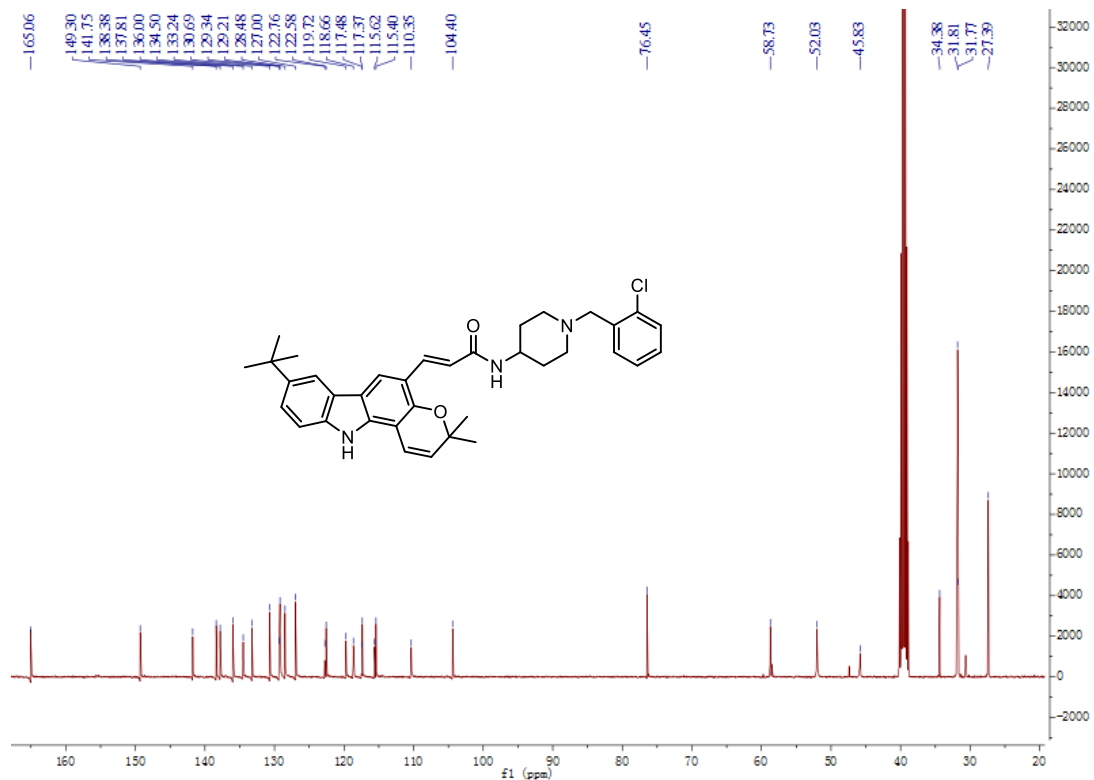

<sup>13</sup>C NMR (DMSO, 400 MHz) Spectrum of Compound 6ad

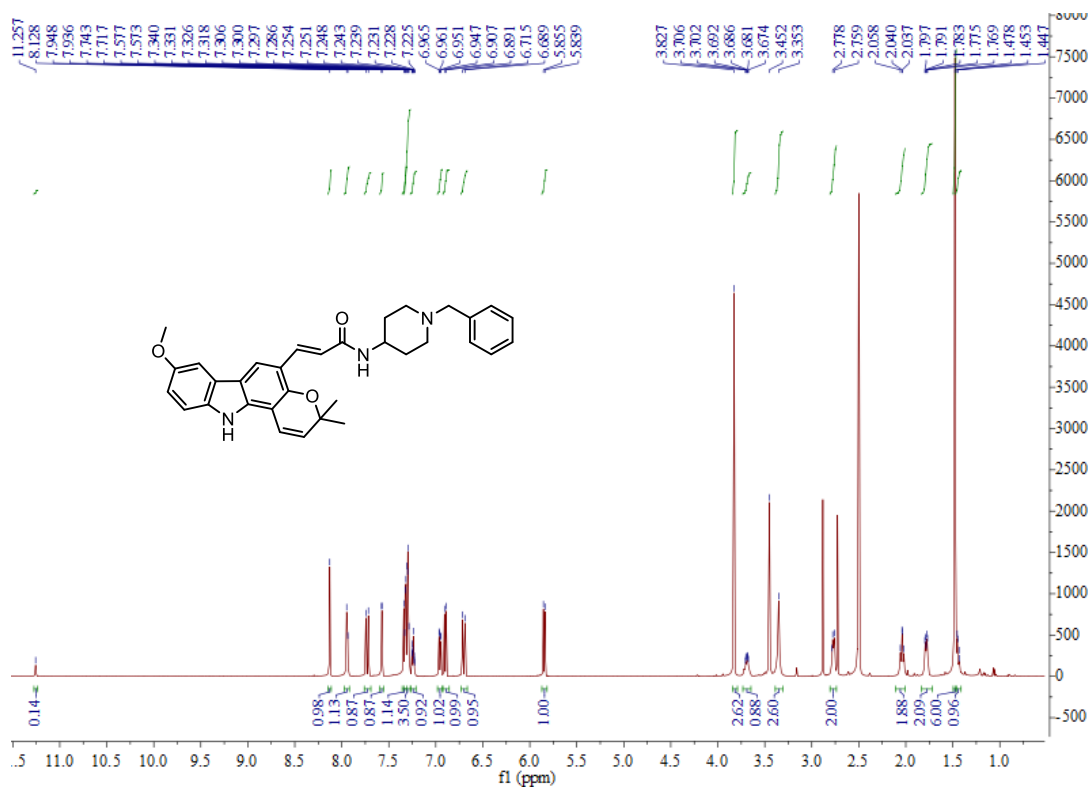

<sup>1</sup>H NMR (DMSO, 600 MHz) Spectrum of Compound 6ae

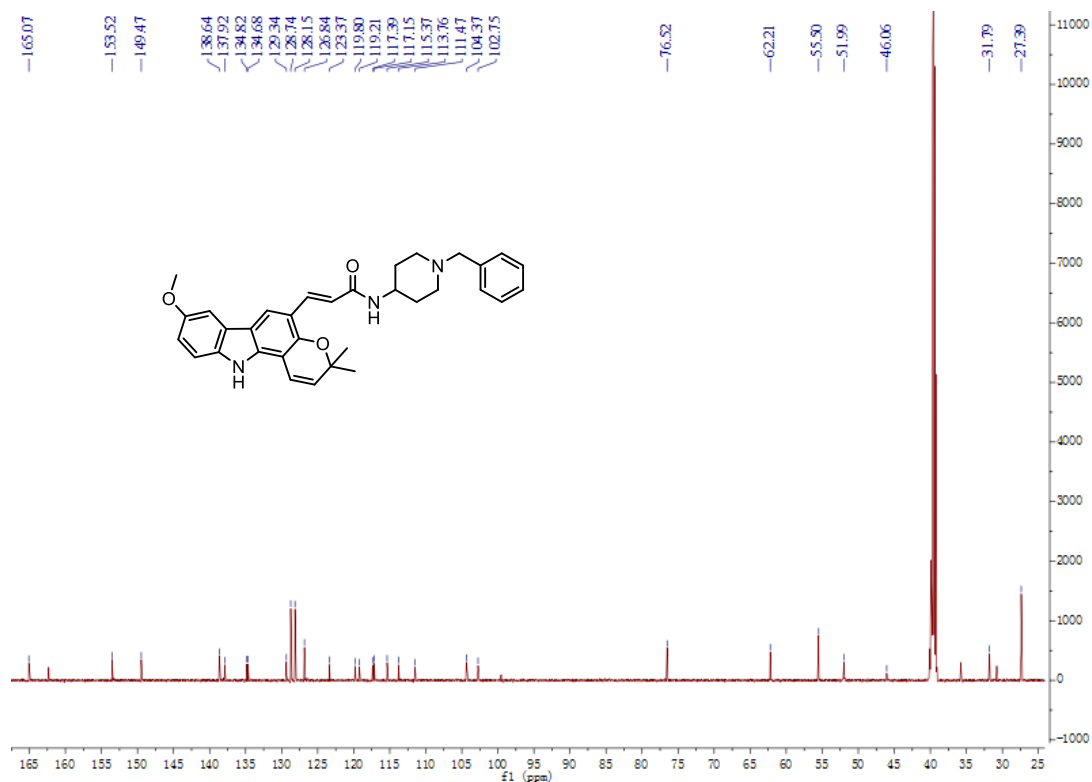

<sup>13</sup>C NMR (DMSO, 600 MHz) Spectrum of Compound 6ae

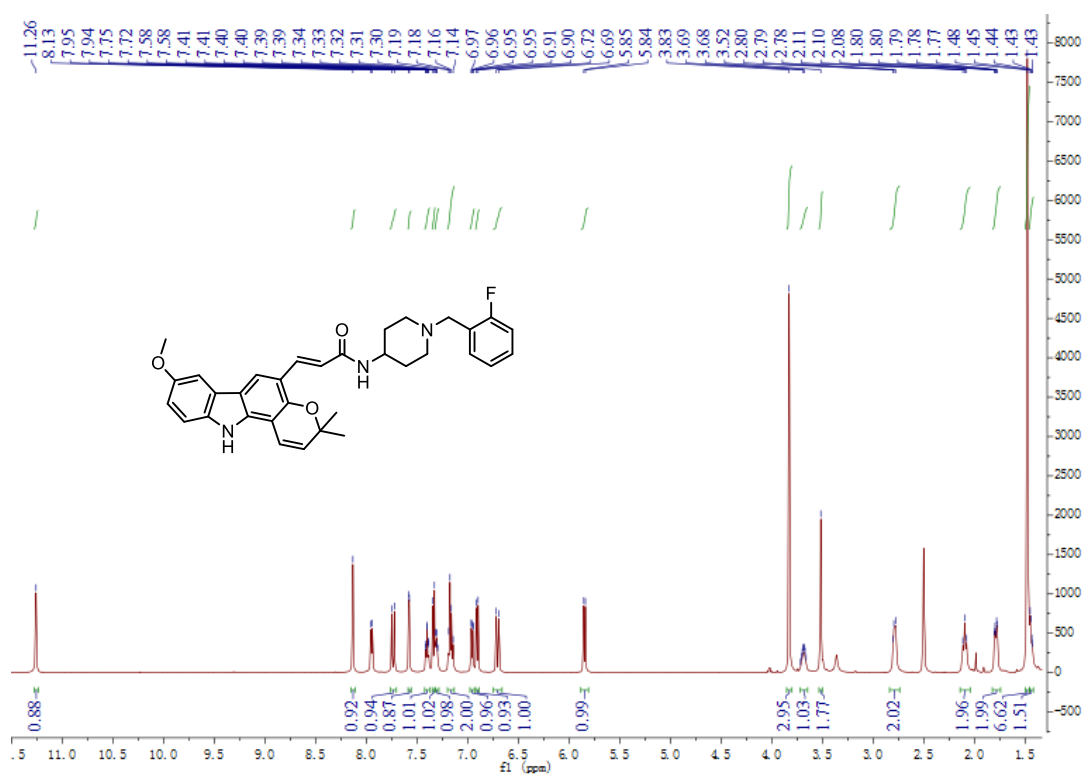

<sup>1</sup>H NMR (DMSO, 600 MHz) Spectrum of Compound 6af

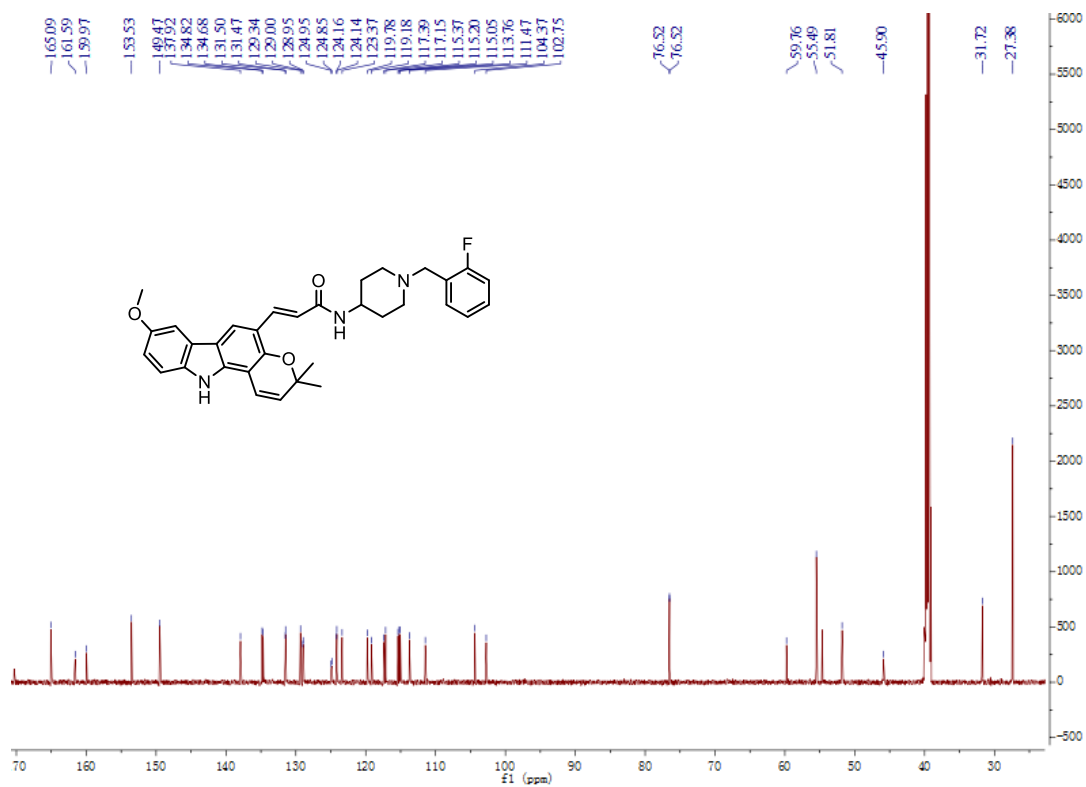

<sup>13</sup>C NMR (DMSO, 600 MHz) Spectrum of Compound 6af

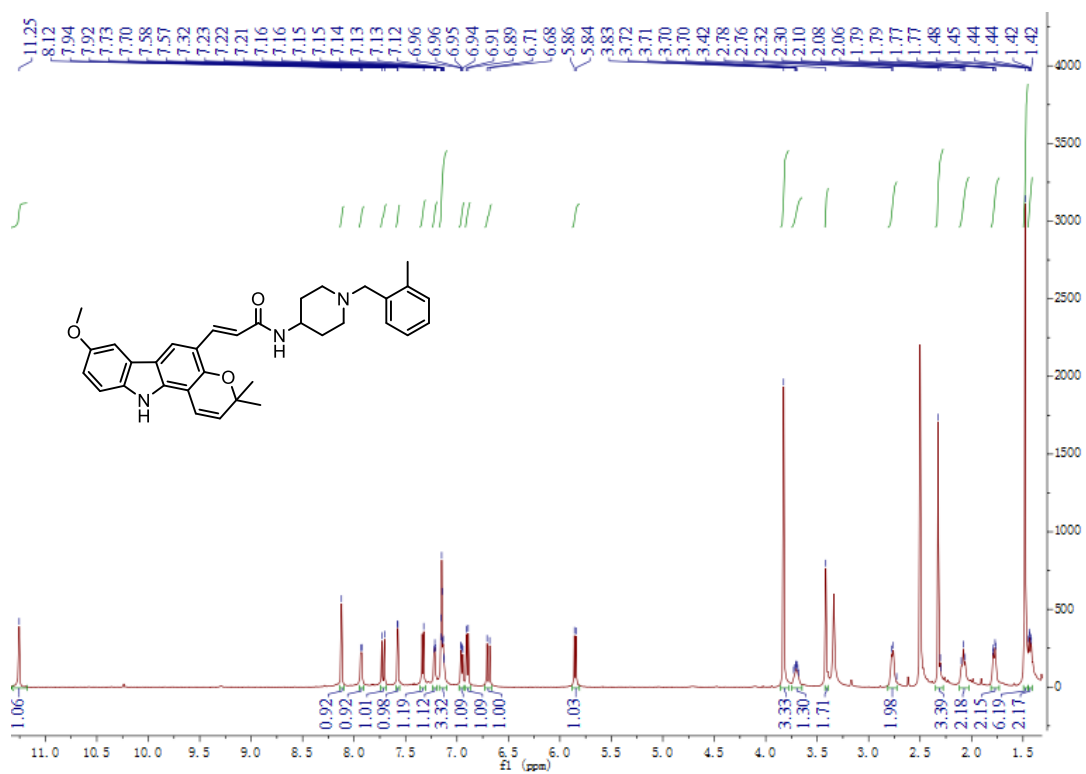

<sup>1</sup>H NMR (DMSO, 600 MHz) Spectrum of Compound 6ag



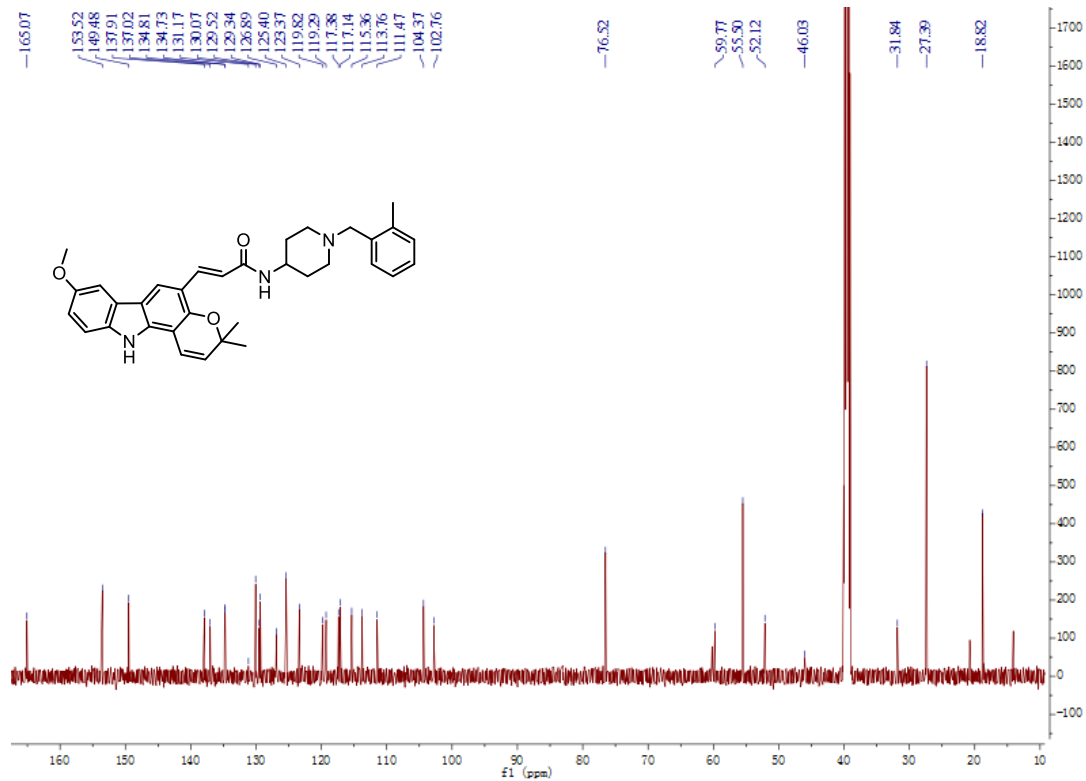

<sup>13</sup>C NMR (DMSO, 600 MHz) Spectrum of Compound 6ag

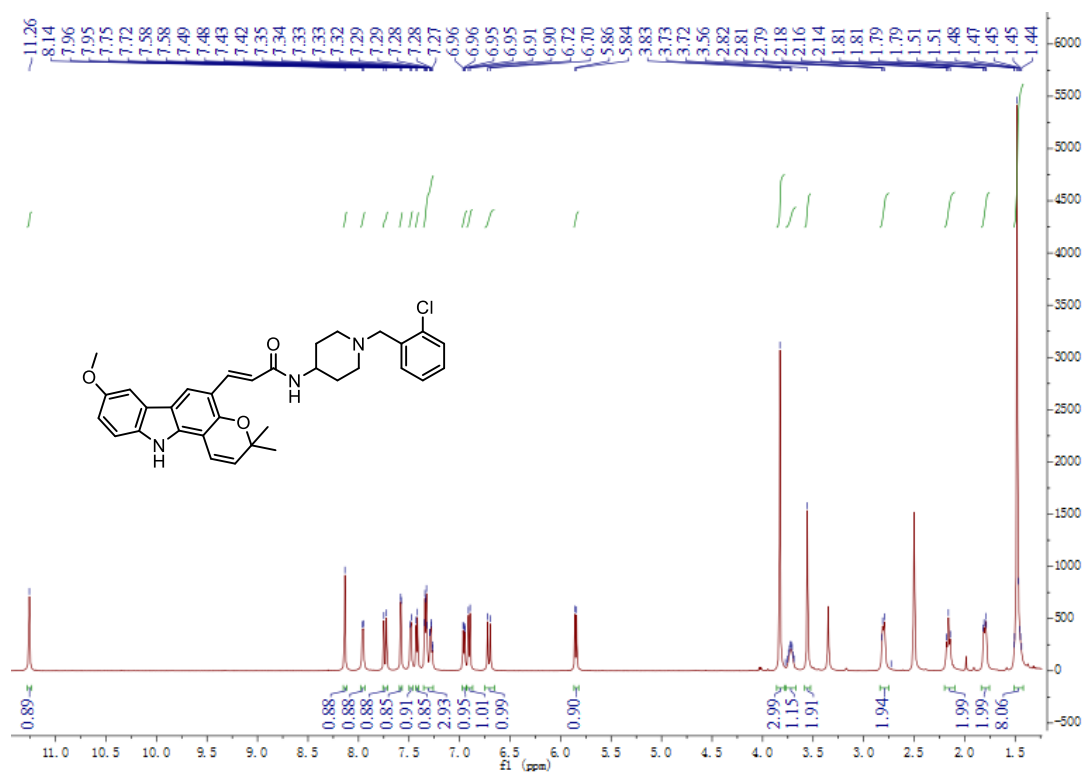

<sup>1</sup>H NMR (DMSO, 600 MHz) Spectrum of Compound 6ah

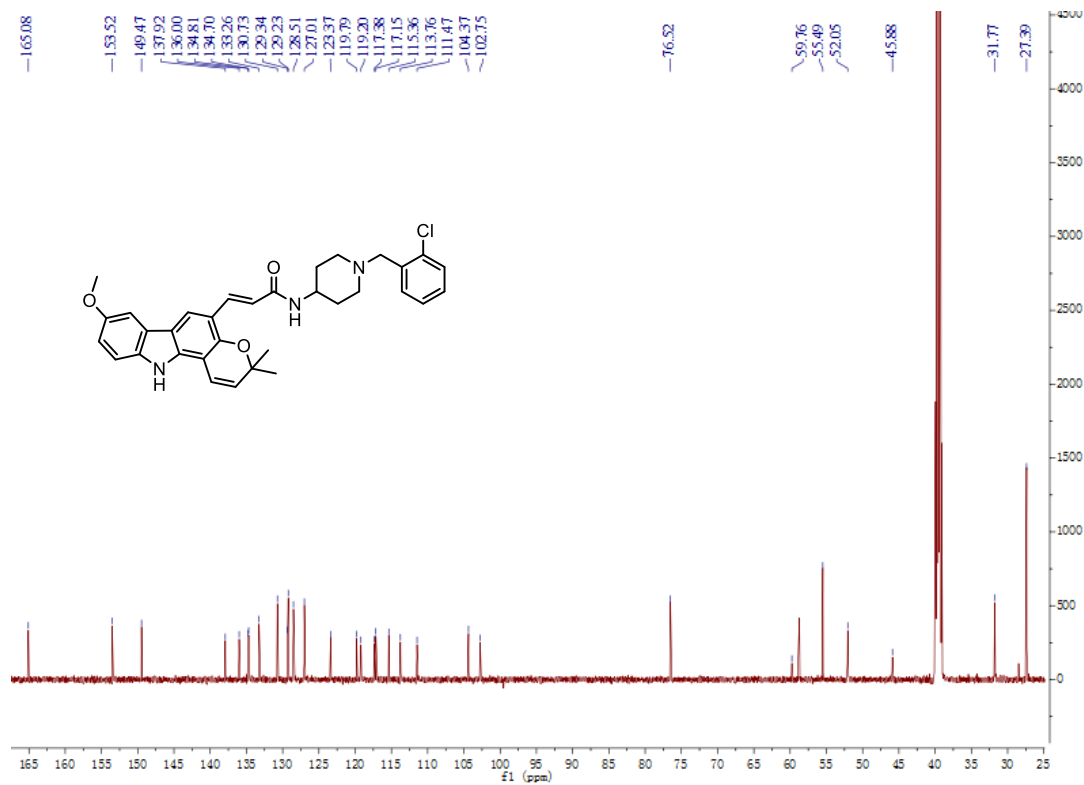

<sup>13</sup>C NMR (DMSO, 600 MHz) Spectrum of Compound 6ah

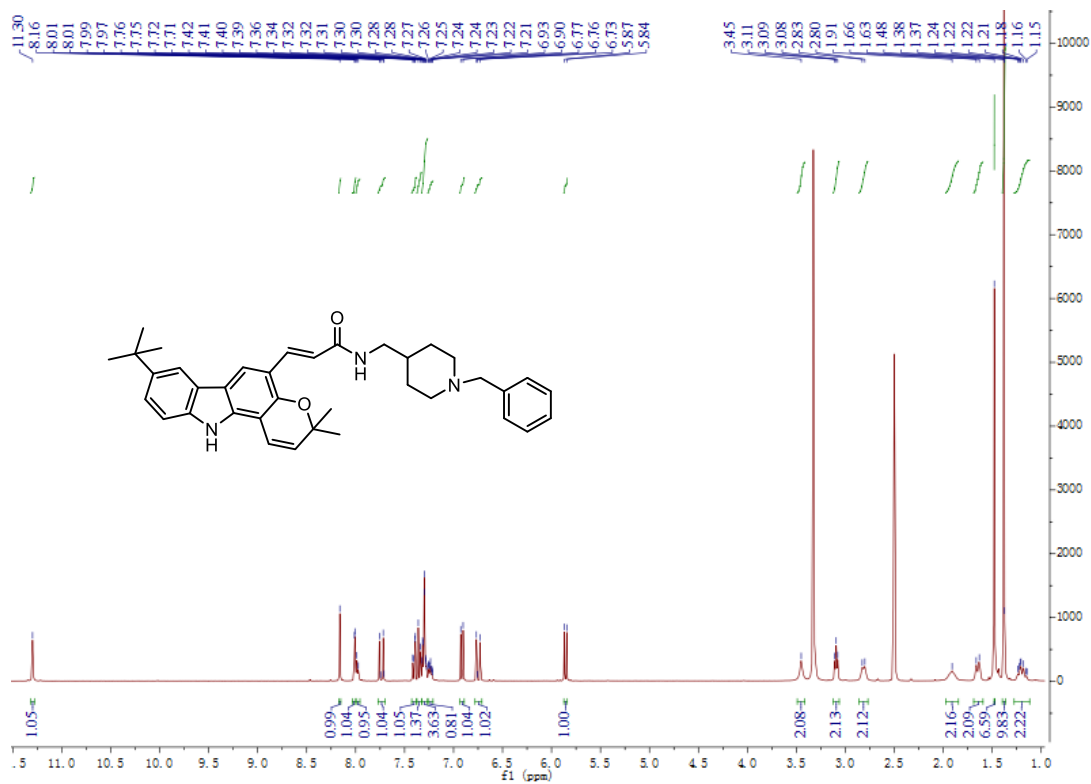

<sup>1</sup>H NMR (DMSO, 400 MHz) Spectrum of Compound 6ba

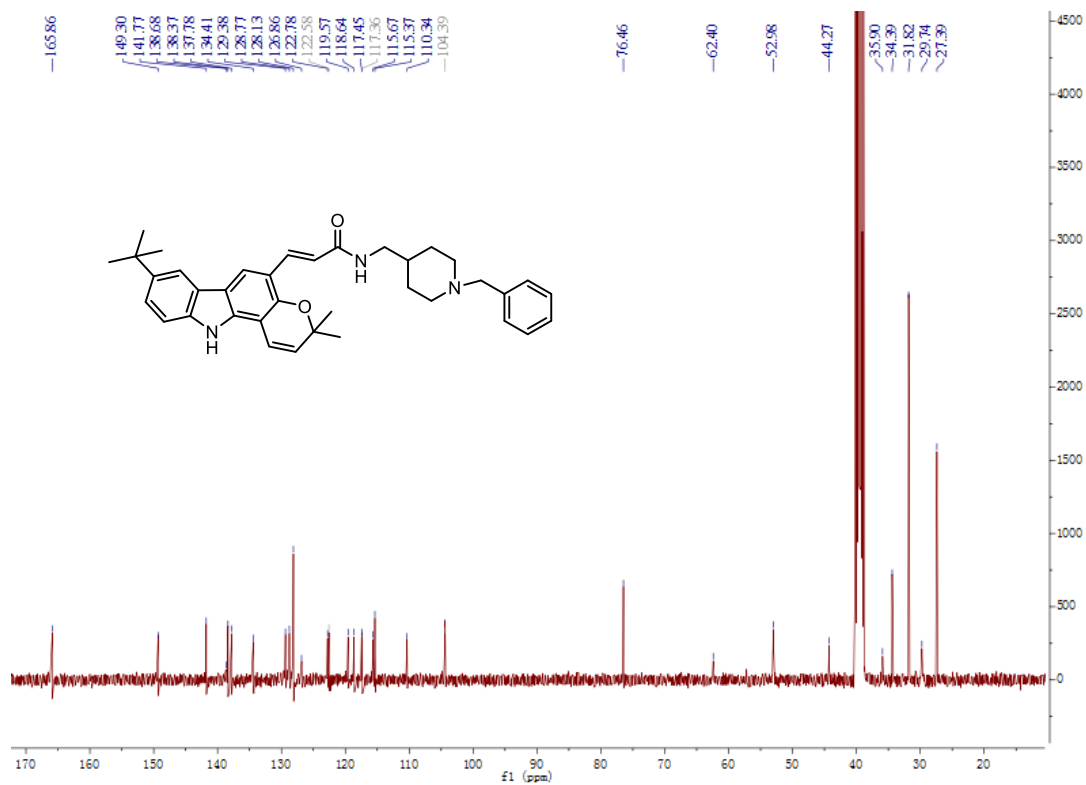

<sup>13</sup>C NMR (DMSO, 400 MHz) Spectrum of Compound 6ba

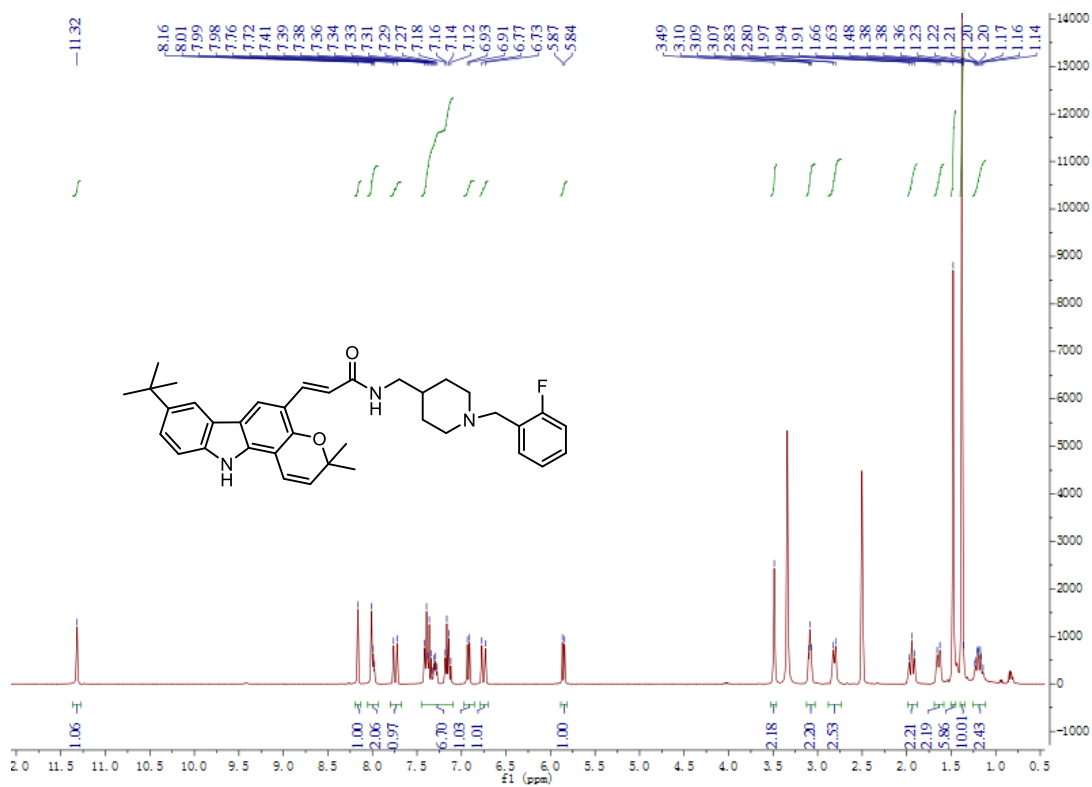

<sup>1</sup>H NMR (DMSO, 400 MHz) Spectrum of Compound 6bb

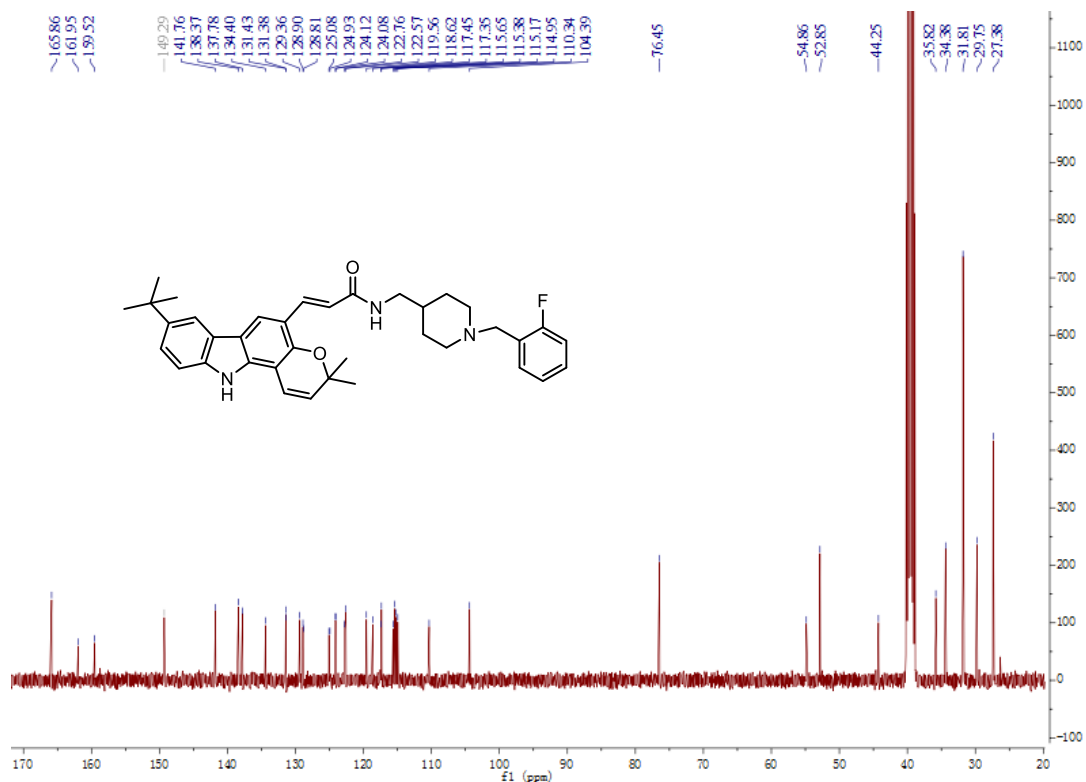

**<sup>13</sup>C NMR (DMSO, 400 MHz) Spectrum of Compound 6bb**

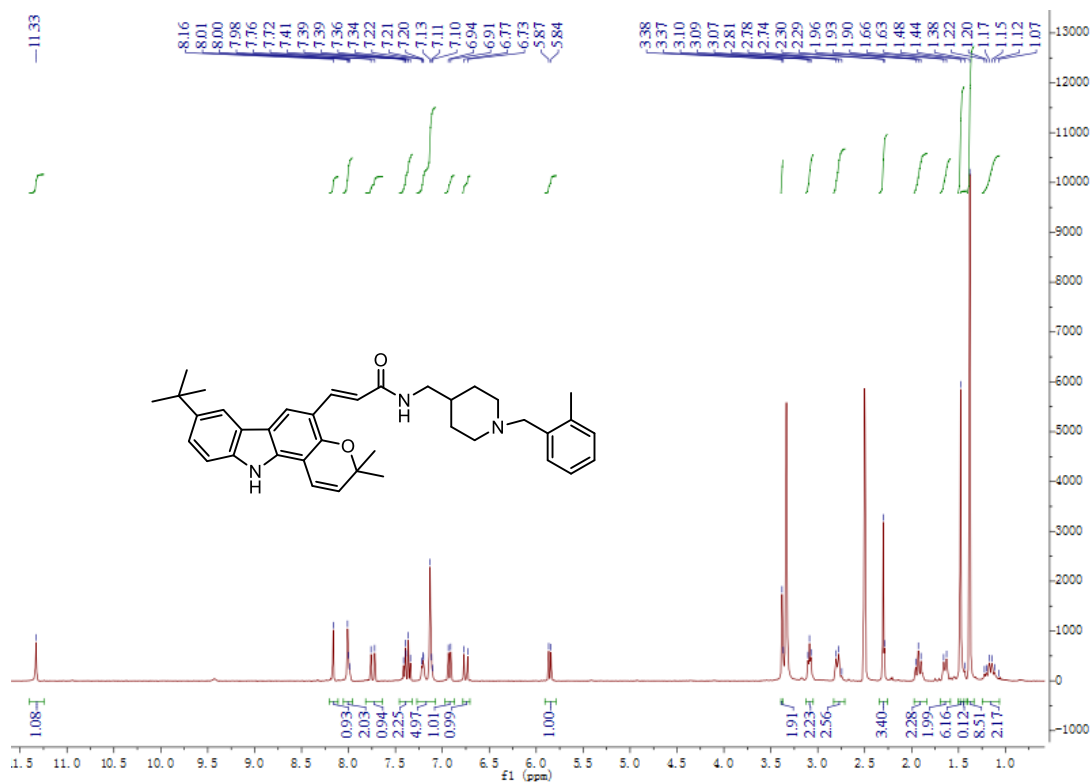

**<sup>1</sup>H NMR (DMSO, 400 MHz) Spectrum of Compound 6bc**

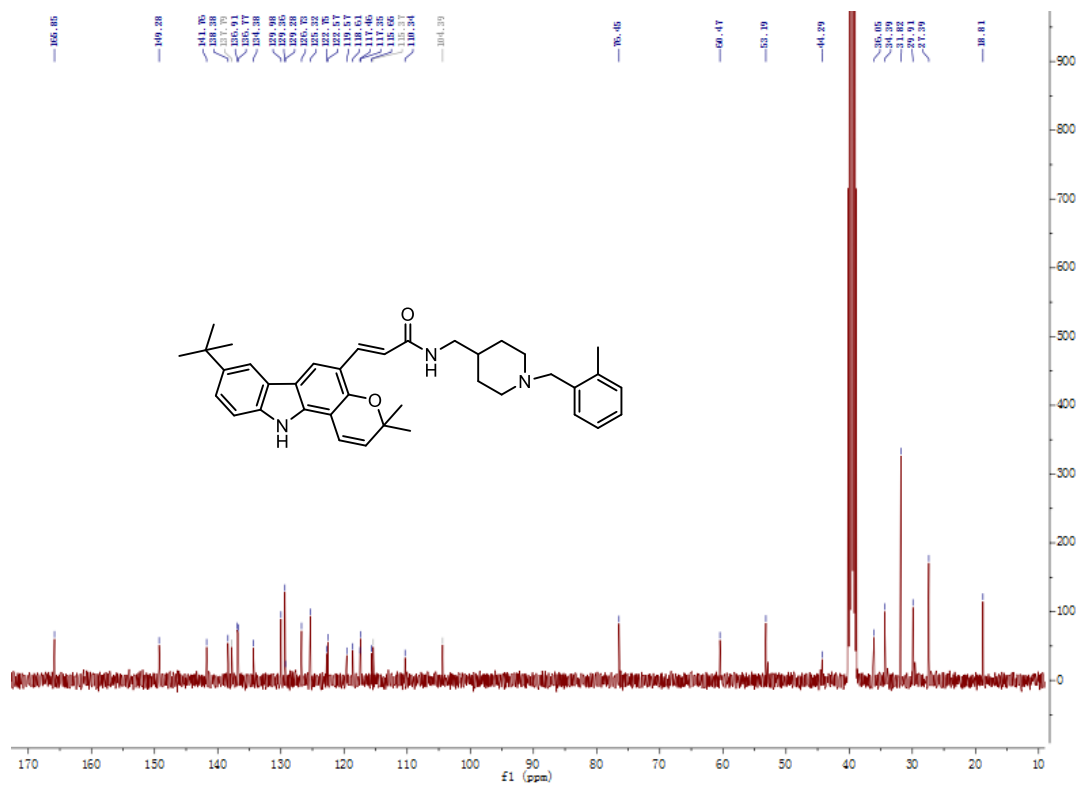

**<sup>13</sup>C NMR (DMSO, 400 MHz) Spectrum of Compound 6bc**

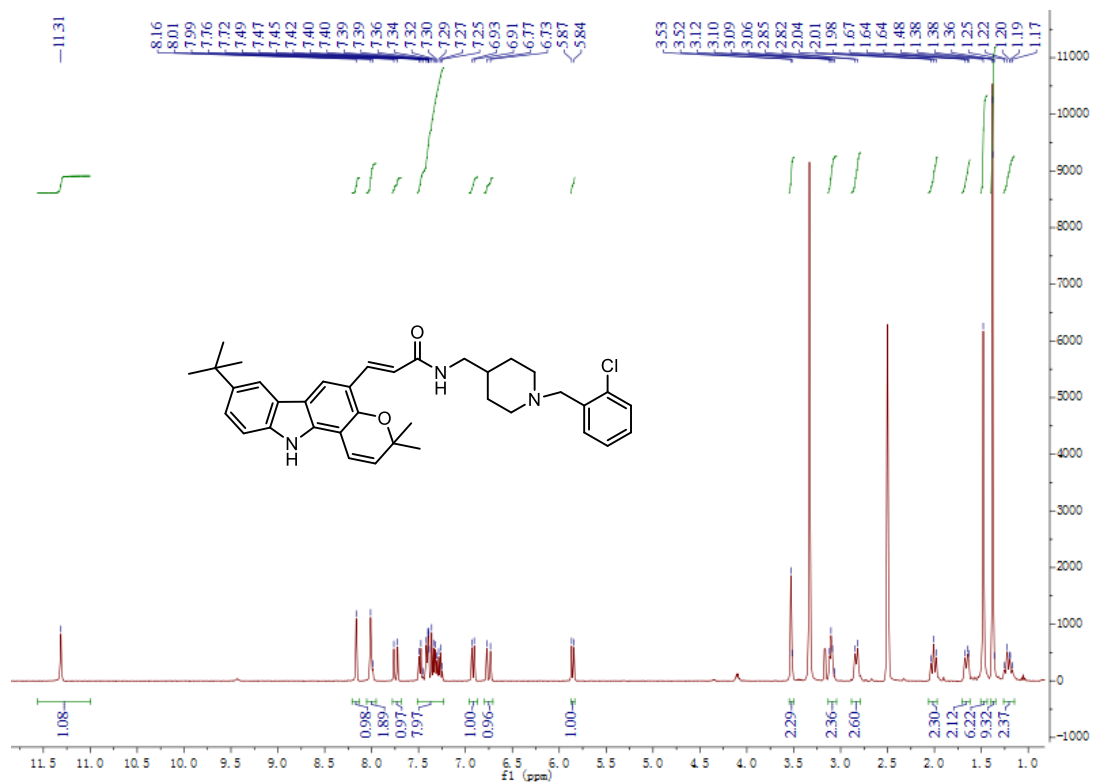

**<sup>1</sup>H NMR (DMSO, 400 MHz) Spectrum of Compound 6bd**

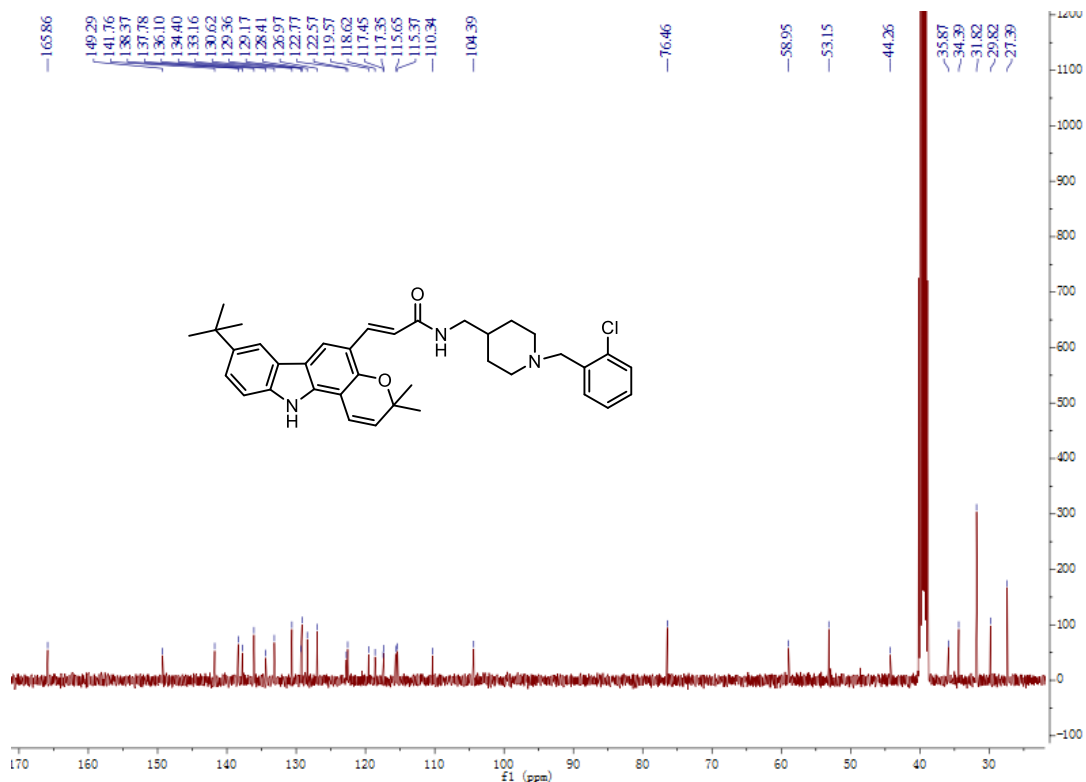

<sup>13</sup>C NMR (DMSO, 400 MHz) Spectrum of Compound 6bd

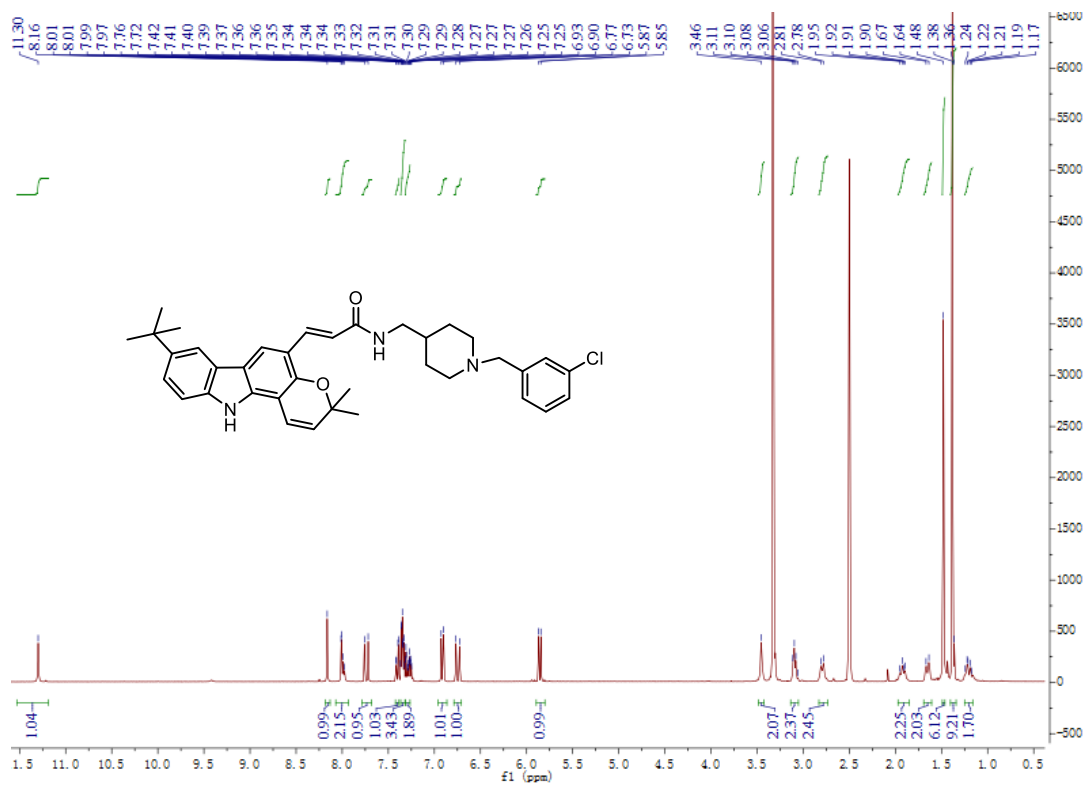

<sup>1</sup>H NMR (DMSO, 400 MHz) Spectrum of Compound 6bd

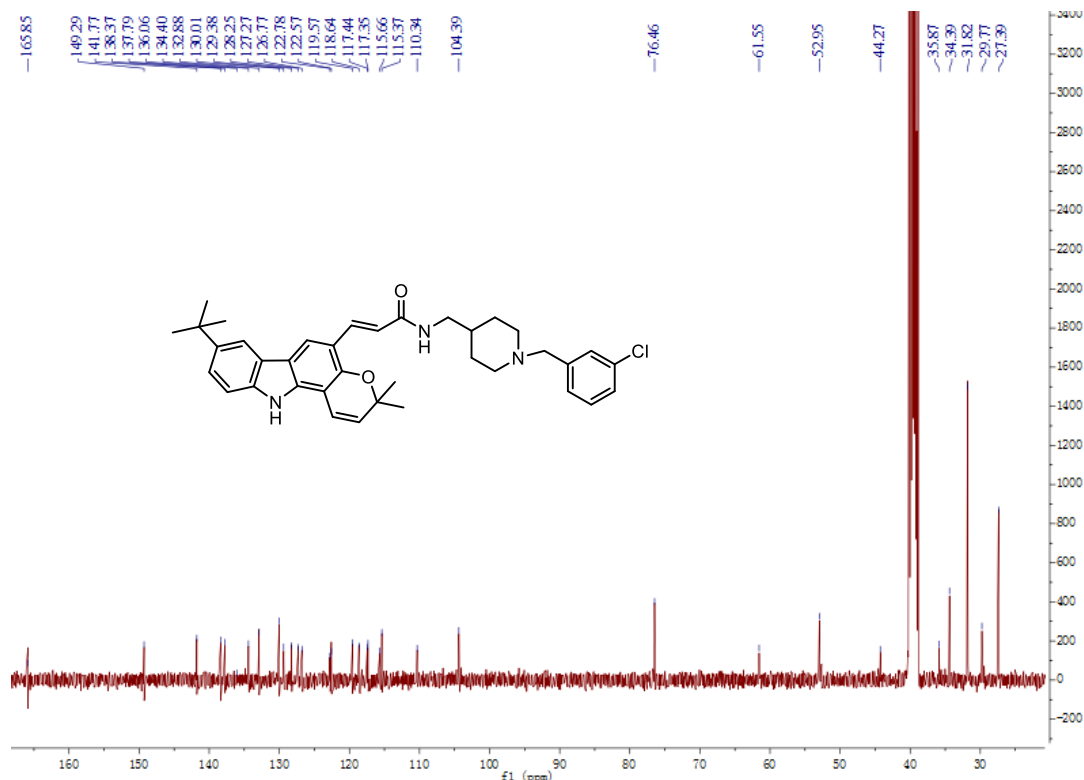

**<sup>13</sup>C NMR (DMSO, 400 MHz) Spectrum of Compound 6be**

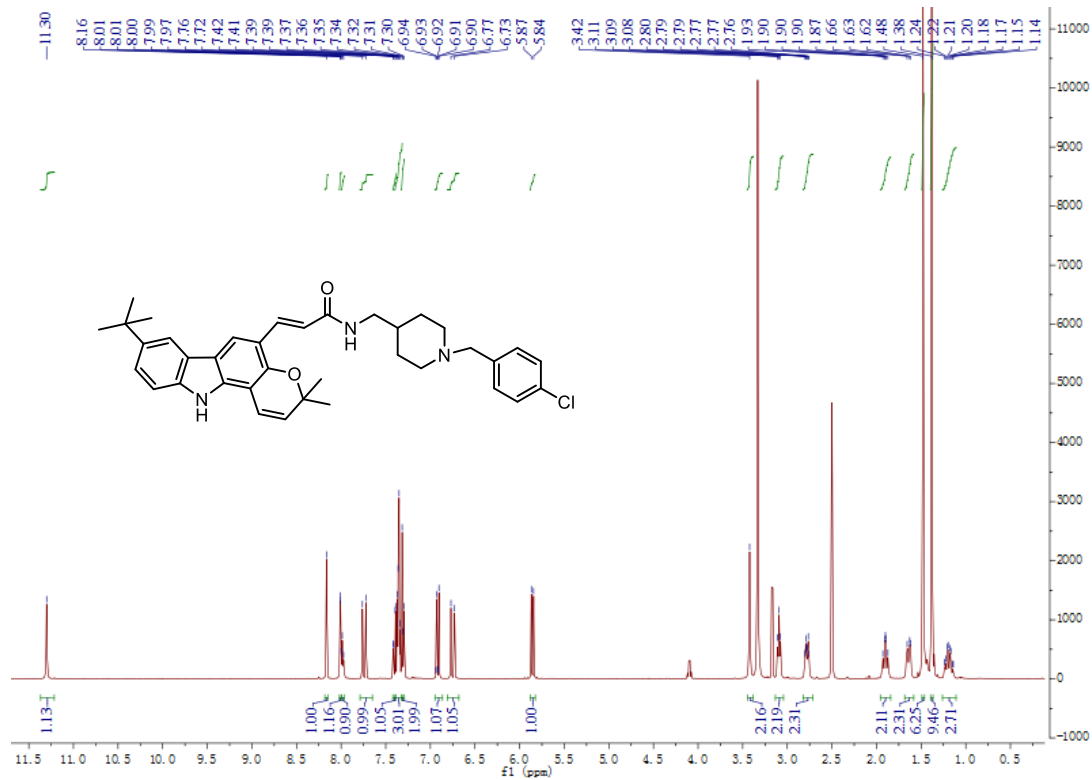

**<sup>1</sup>H NMR (DMSO, 400 MHz) Spectrum of Compound 6bf**

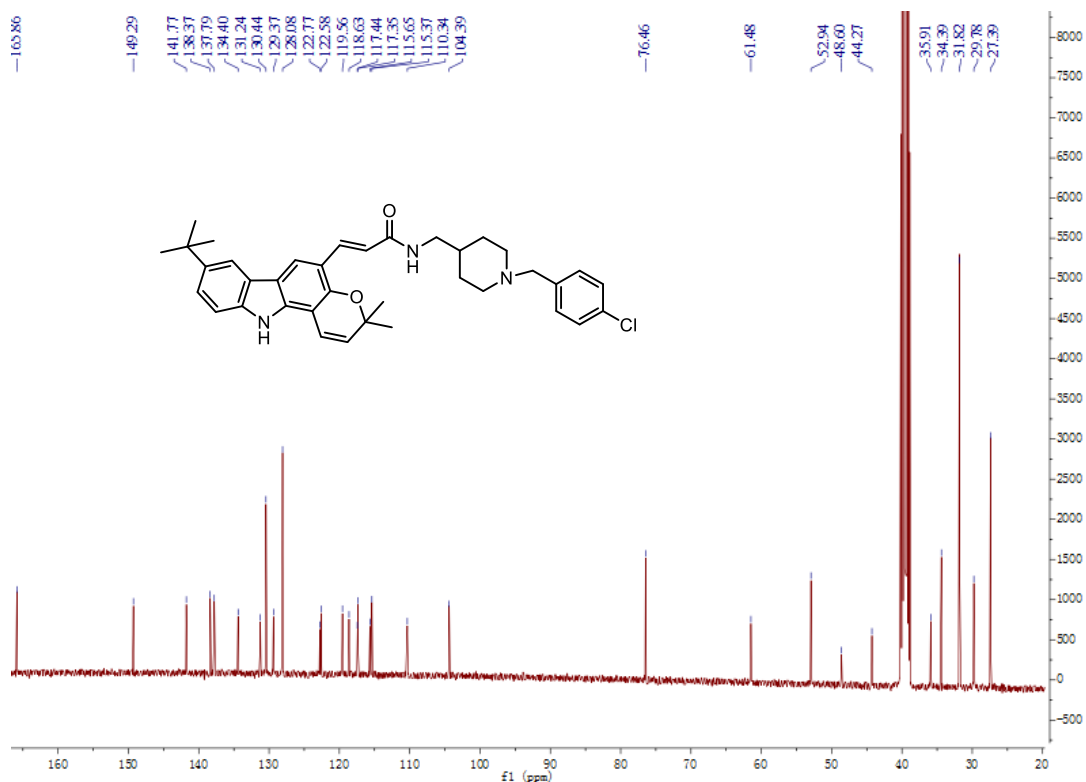

<sup>13</sup>C NMR (DMSO, 400 MHz) Spectrum of Compound 6bf

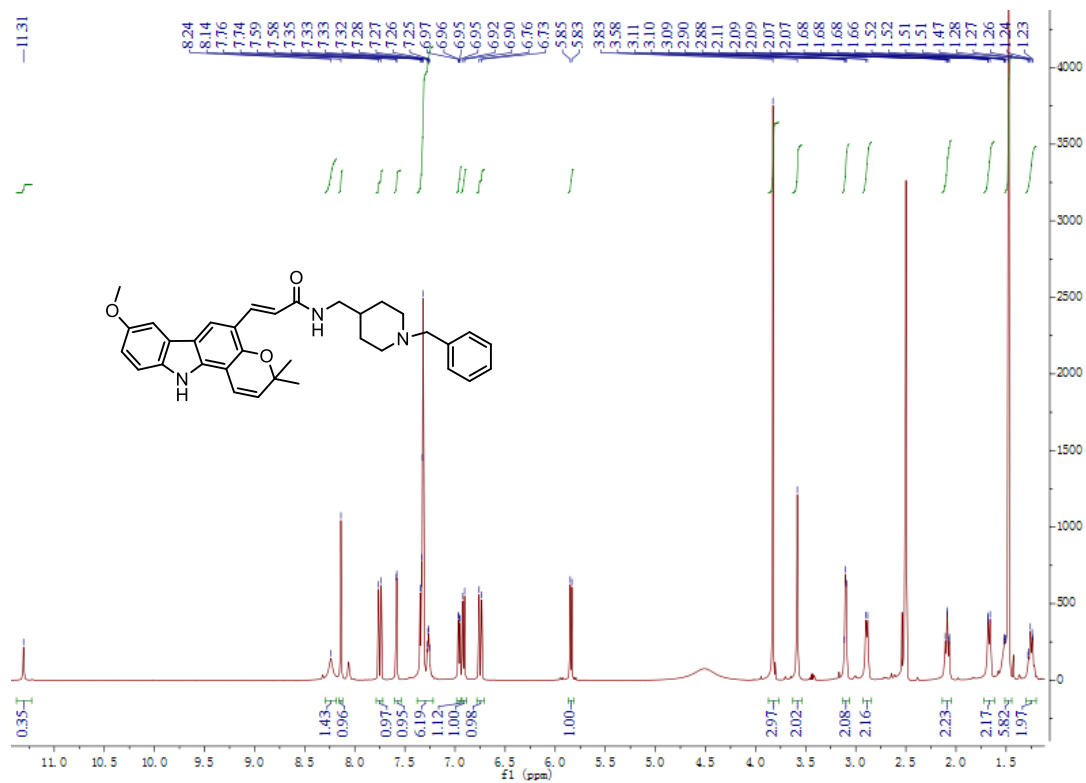

<sup>1</sup>H NMR (DMSO, 600 MHz) Spectrum of Compound 6bg



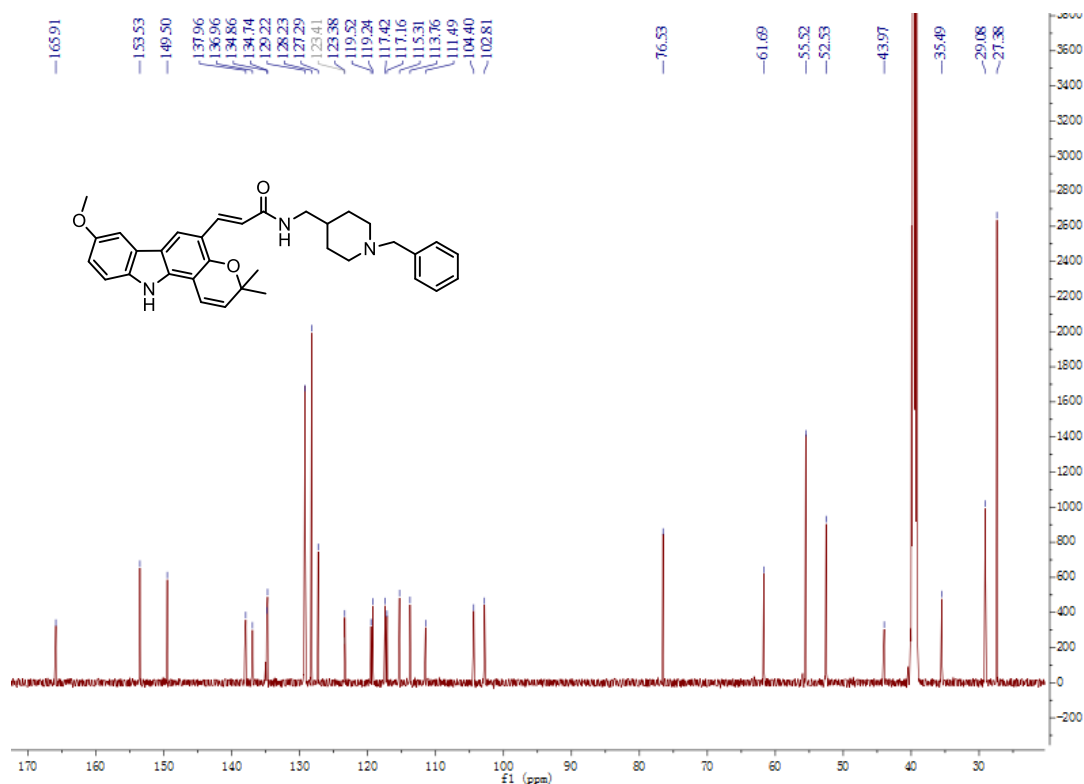

<sup>13</sup>C NMR (DMSO, 600 MHz) Spectrum of Compound 6bg

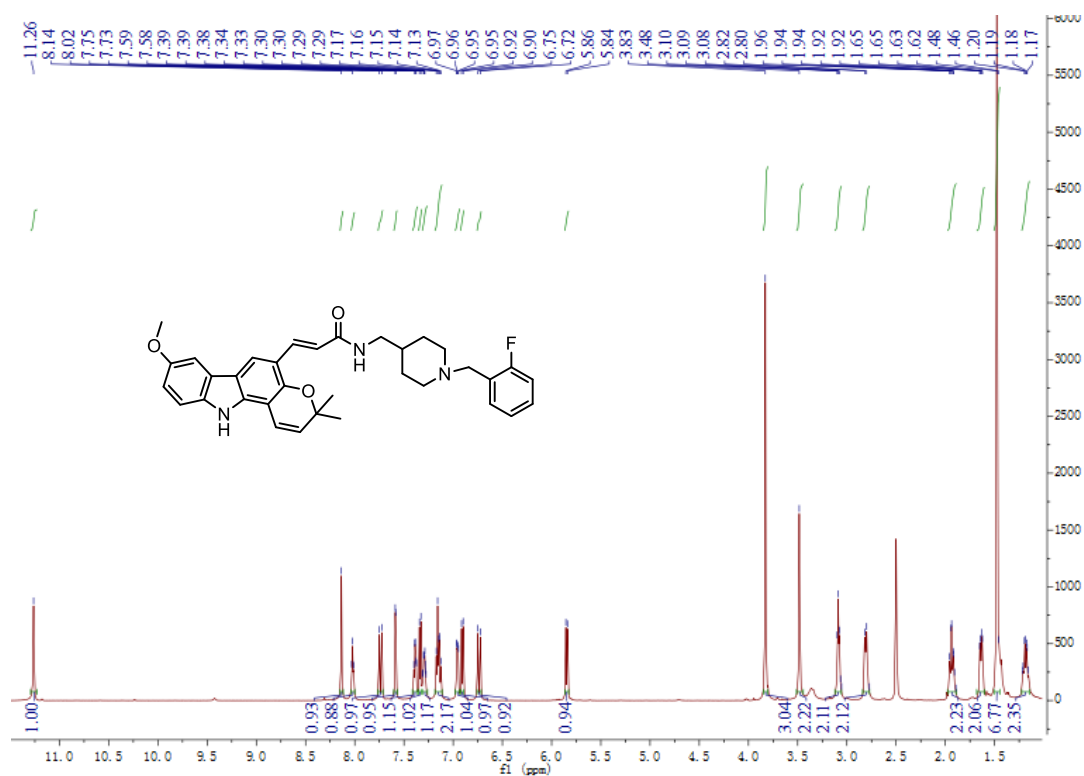

<sup>1</sup>H NMR (DMSO, 600 MHz) Spectrum of Compound 6bh

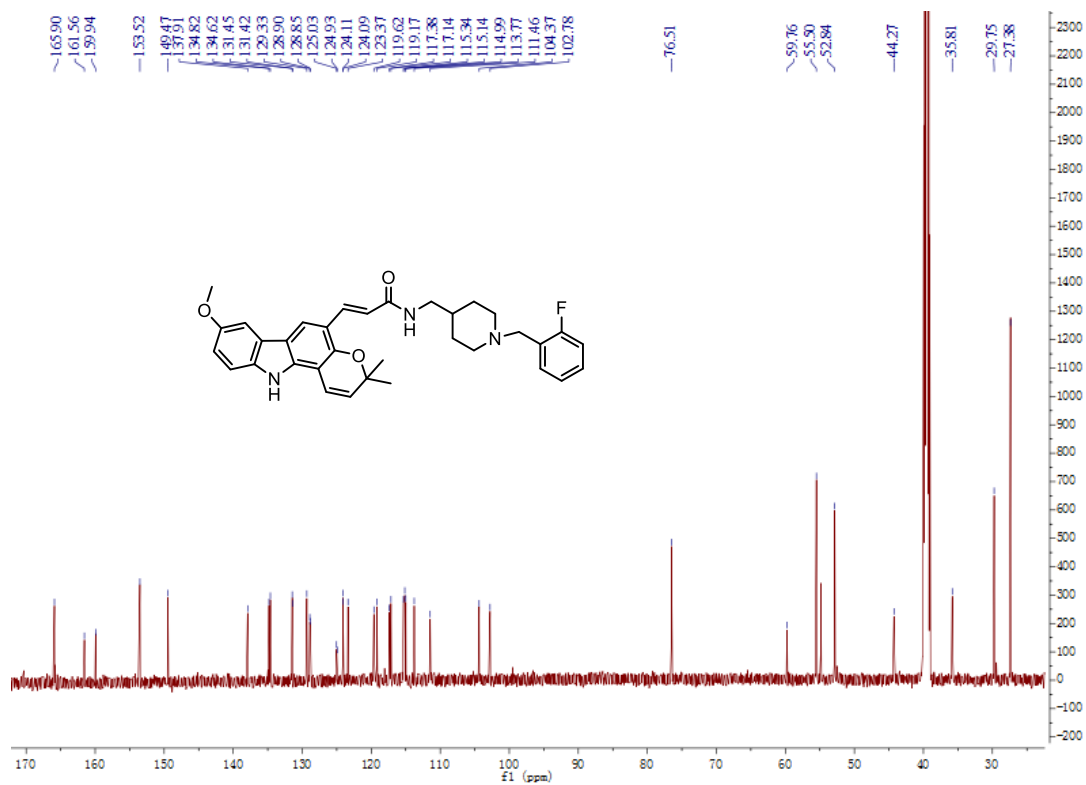

<sup>13</sup>C NMR (DMSO, 600 MHz) Spectrum of Compound 6bh

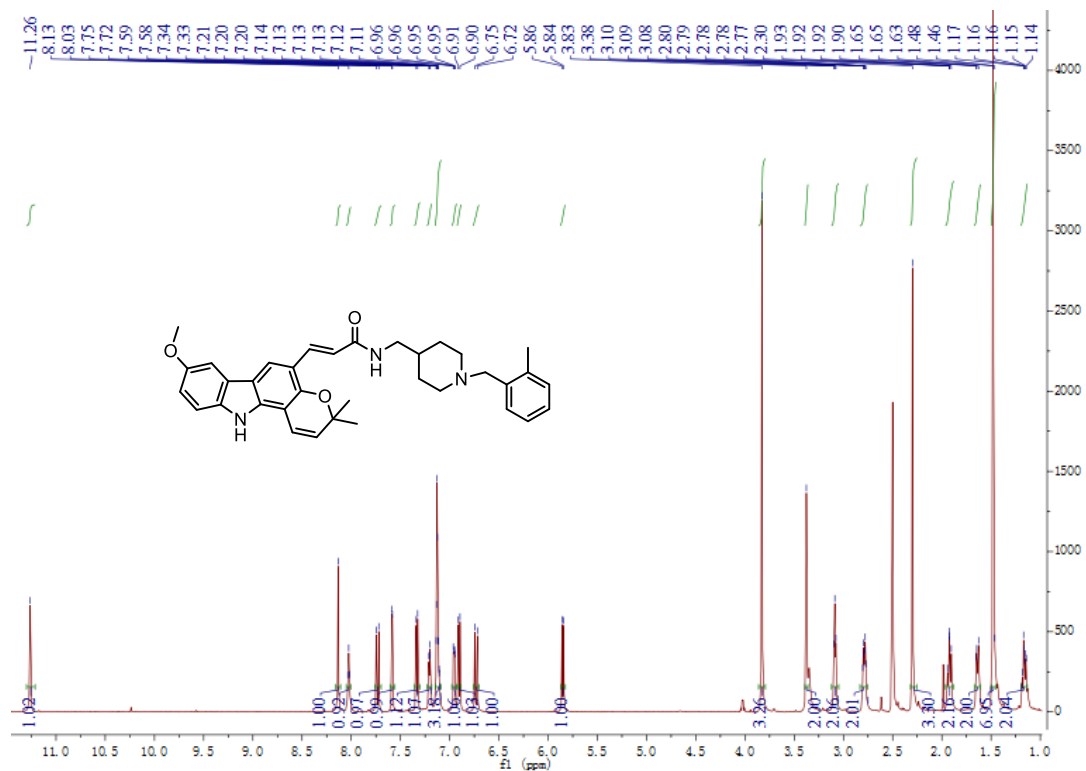

<sup>1</sup>H NMR (DMSO, 600 MHz) Spectrum of Compound 6bi

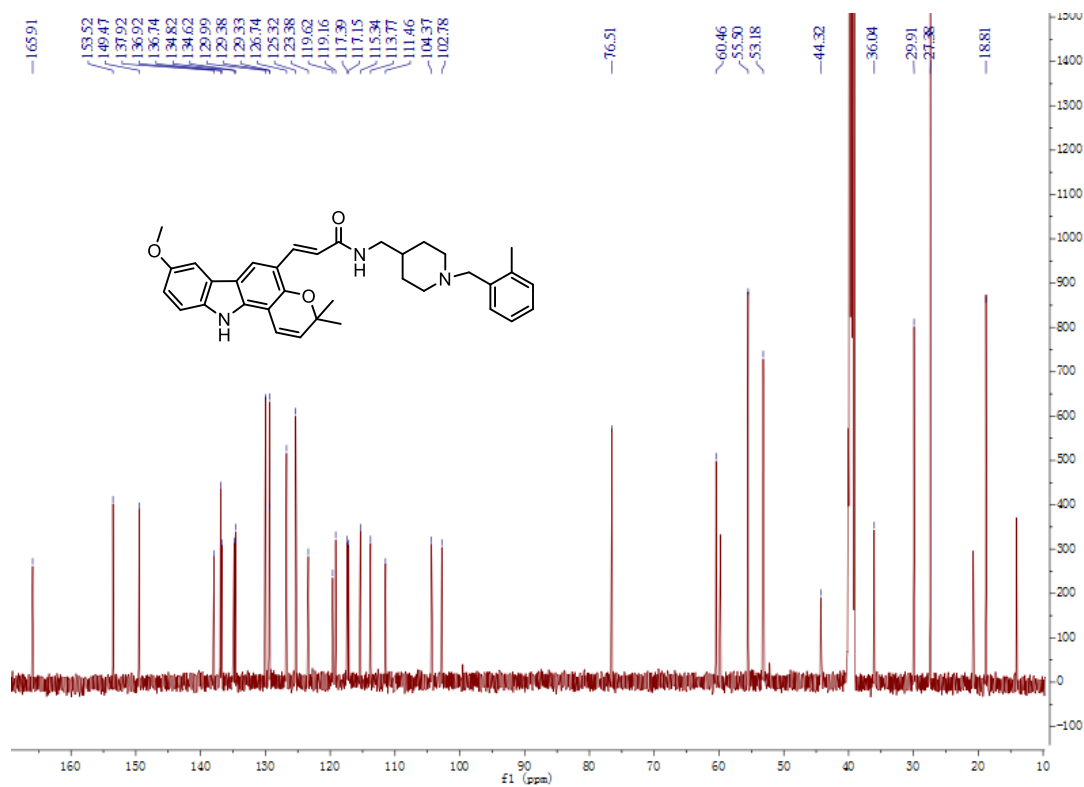

**<sup>13</sup>C NMR (DMSO, 600 MHz) Spectrum of Compound 6bi**

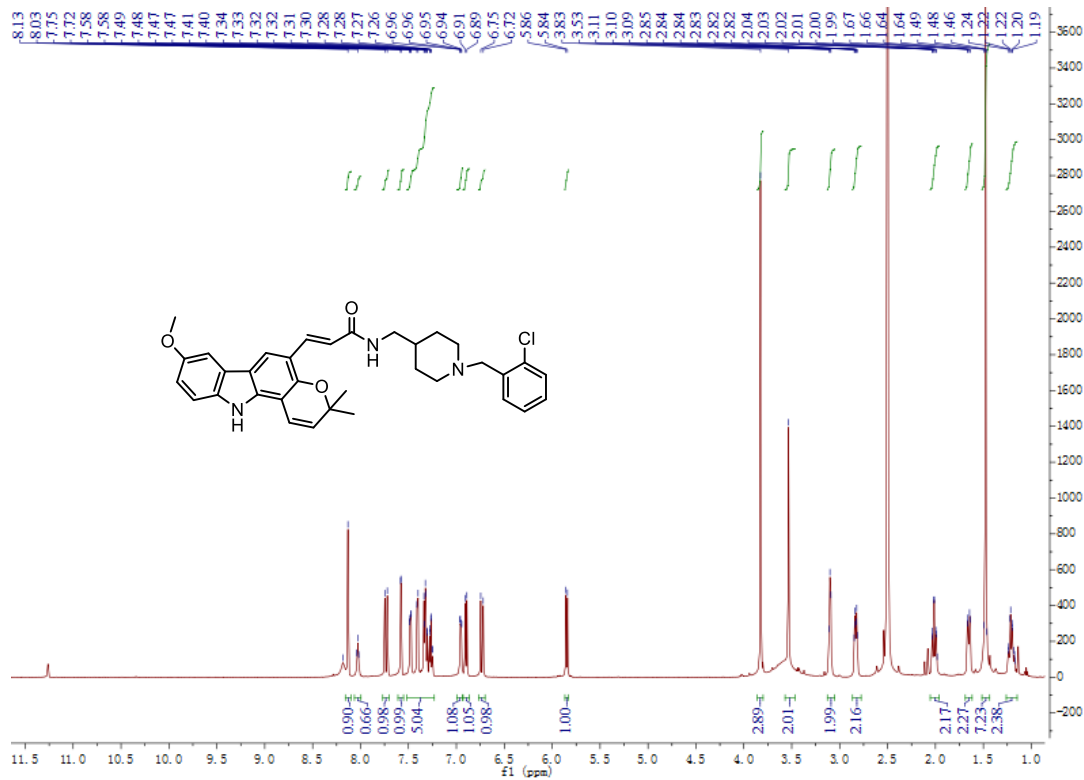

**<sup>1</sup>H NMR (DMSO, 600 MHz) Spectrum of Compound 6bj**

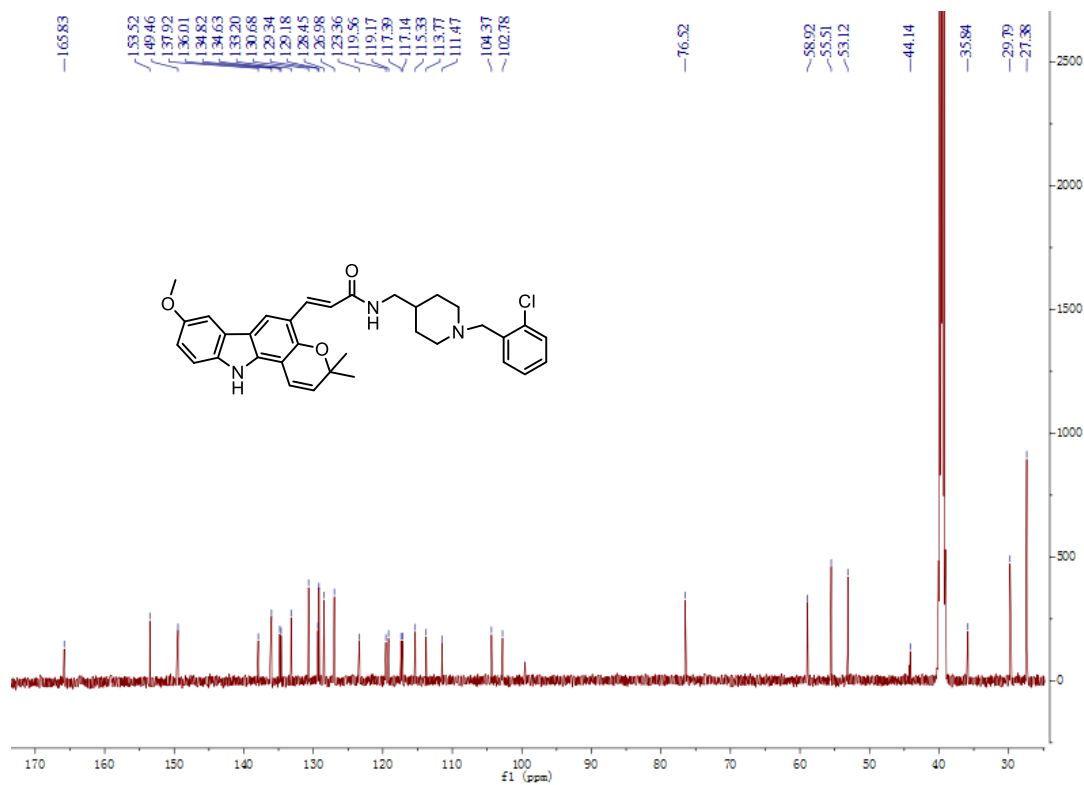

<sup>13</sup>C NMR (DMSO, 600 MHz) Spectrum of Compound 6bj

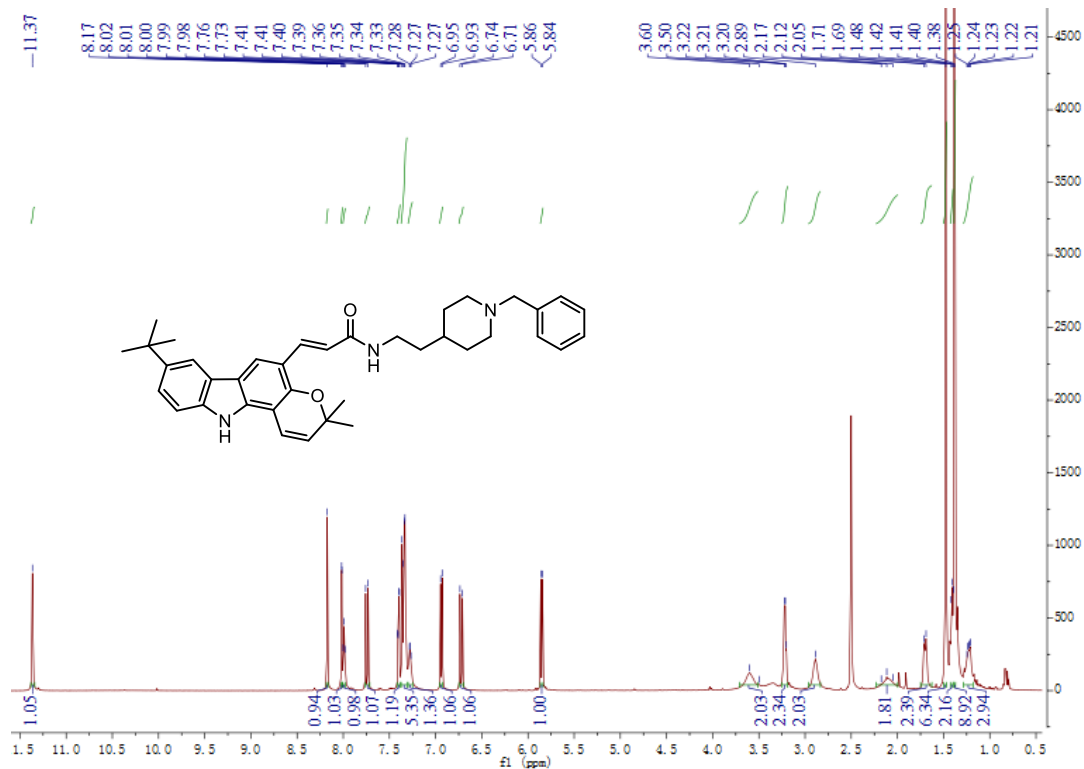

<sup>1</sup>H NMR (DMSO, 400 MHz) Spectrum of Compound 6ca

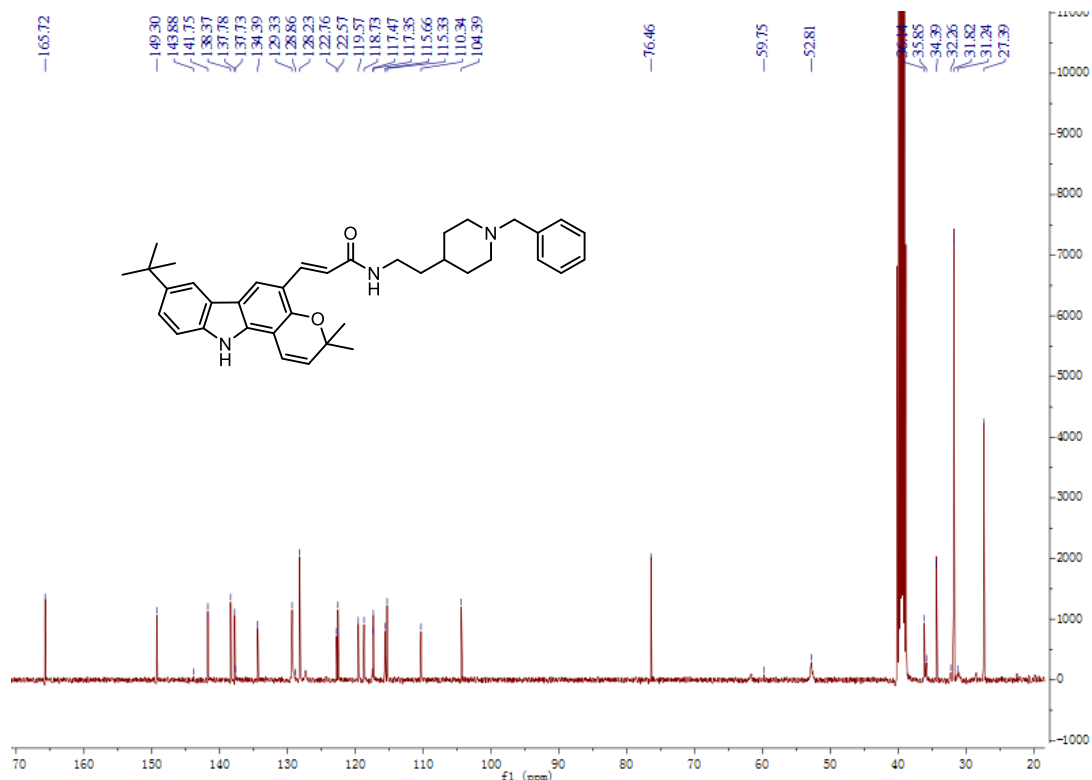

<sup>13</sup>C NMR (DMSO, 400 MHz) Spectrum of Compound 6ca

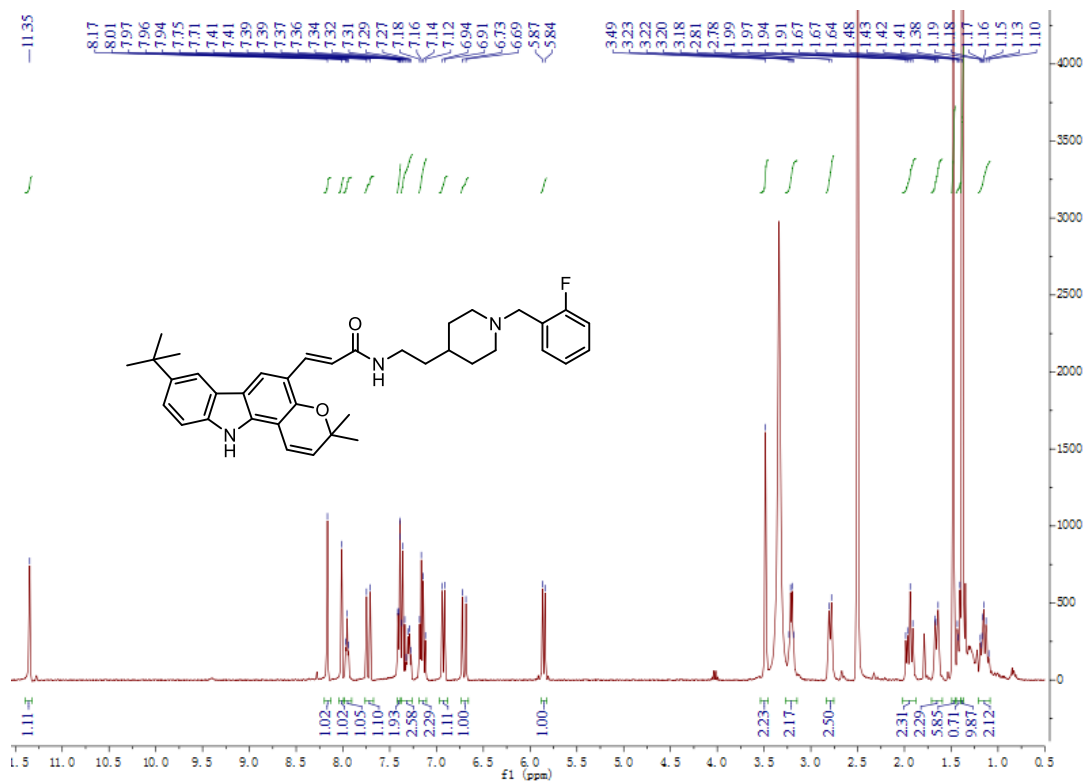

<sup>1</sup>H NMR (DMSO, 400 MHz) Spectrum of Compound 6cb

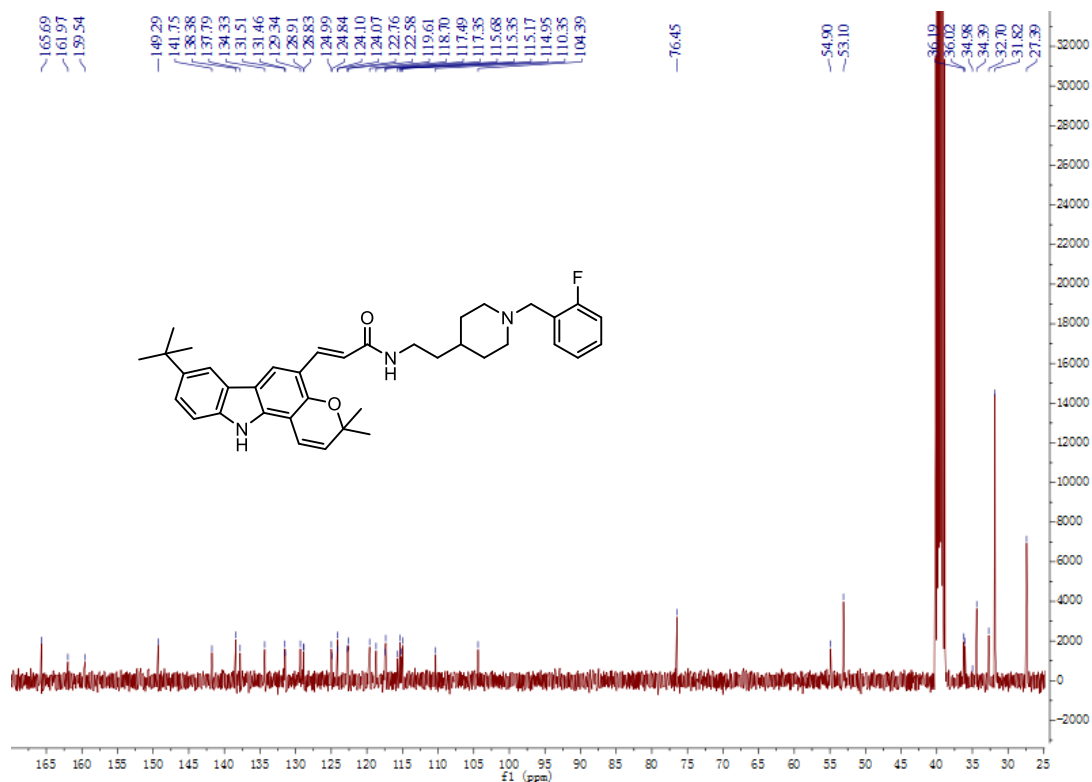

**<sup>13</sup>C NMR (DMSO, 400 MHz) Spectrum of Compound 6cb**

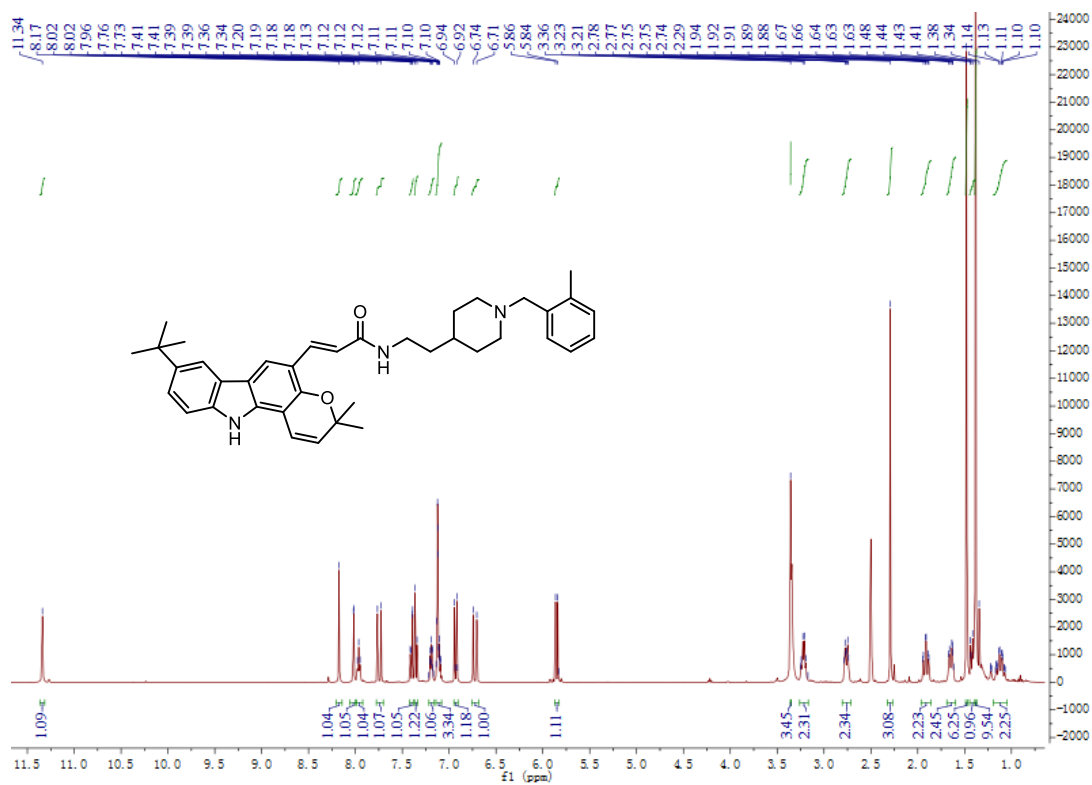

**<sup>1</sup>H NMR (DMSO, 400 MHz) Spectrum of Compound 6cc**

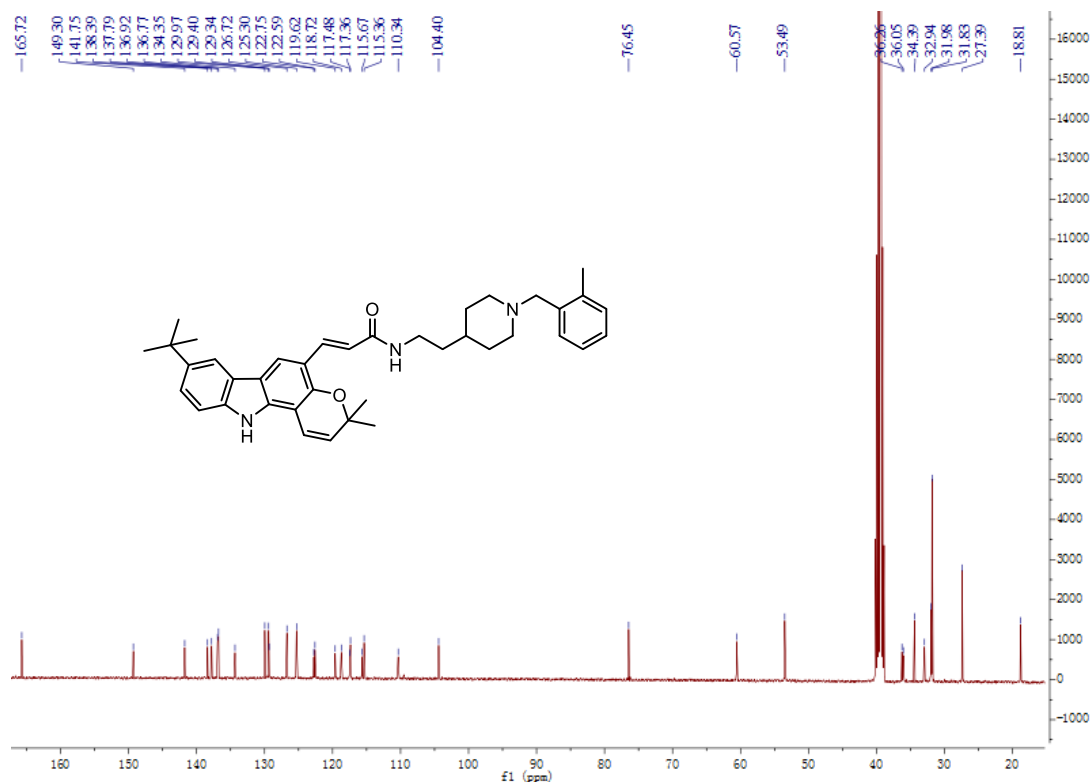

<sup>13</sup>C NMR (DMSO, 400 MHz) Spectrum of Compound 6cc

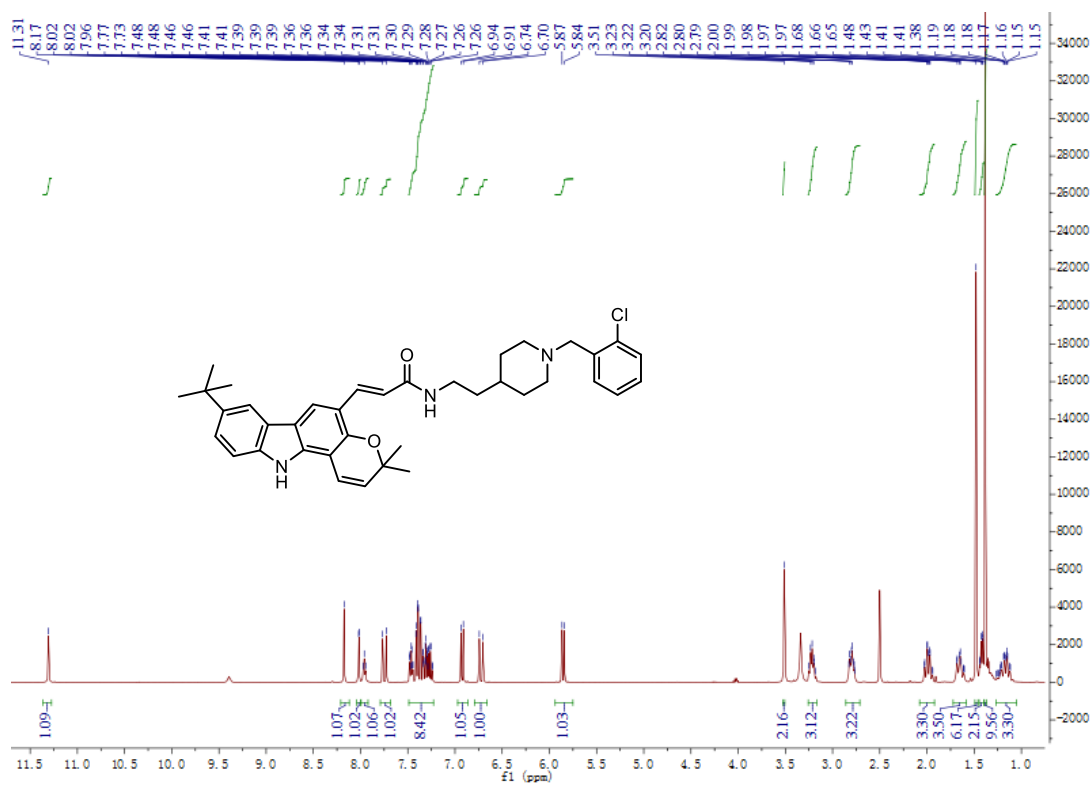

<sup>1</sup>H NMR (DMSO, 400 MHz) Spectrum of Compound 6cd

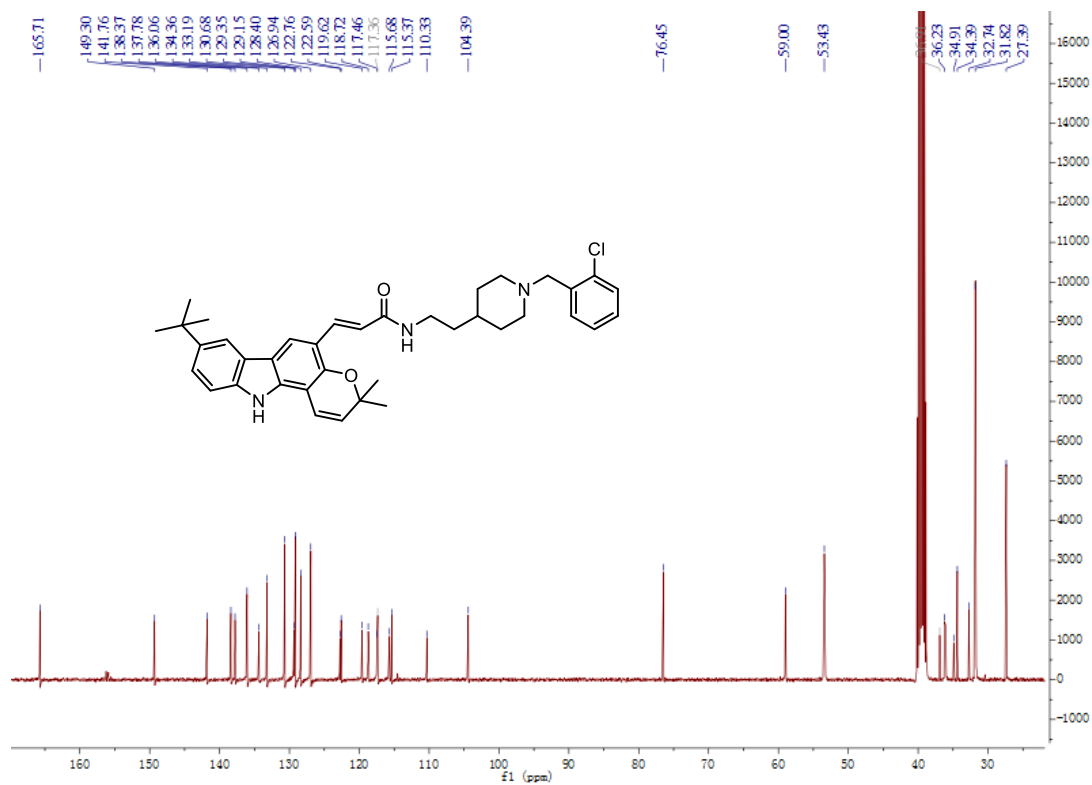

<sup>13</sup>C NMR (DMSO, 400 MHz) Spectrum of Compound 6cd

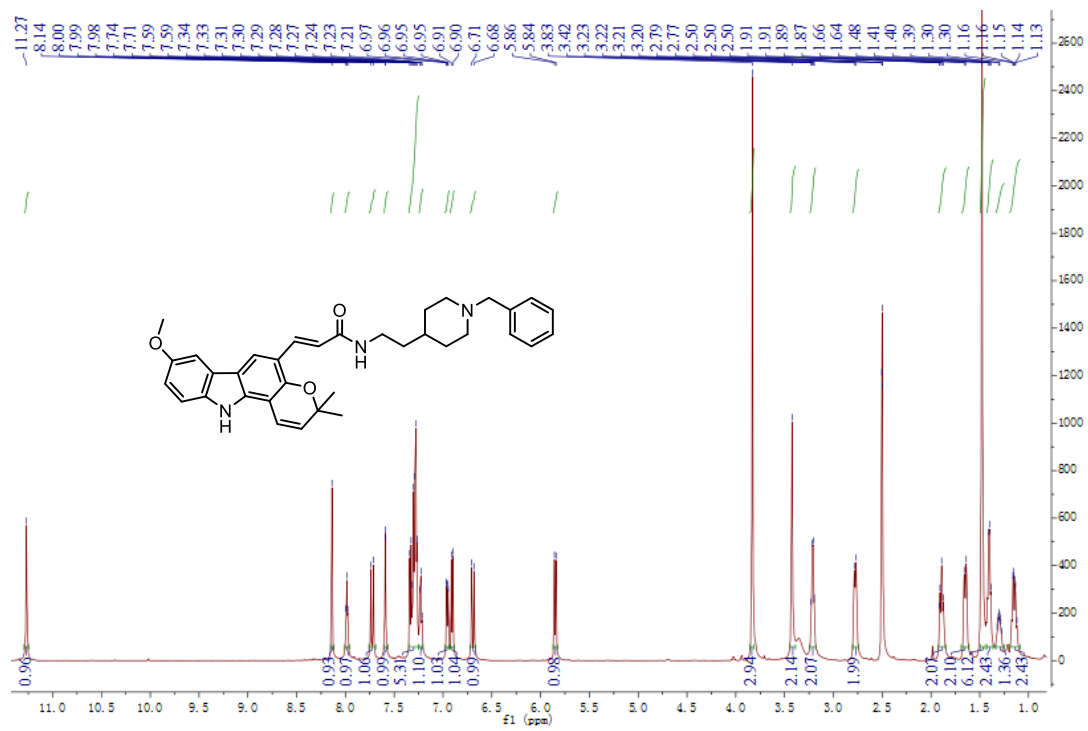

<sup>1</sup>H NMR (DMSO, 600 MHz) Spectrum of Compound 6ce



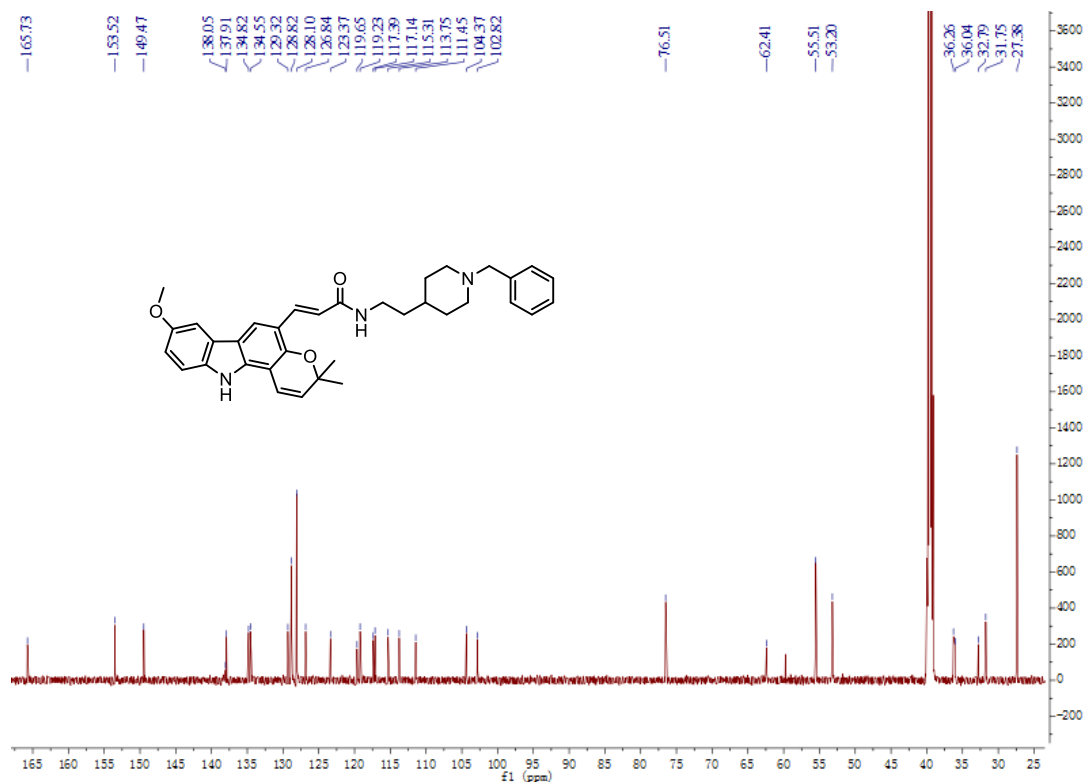

<sup>13</sup>C NMR (DMSO, 600 MHz) Spectrum of Compound 6ce

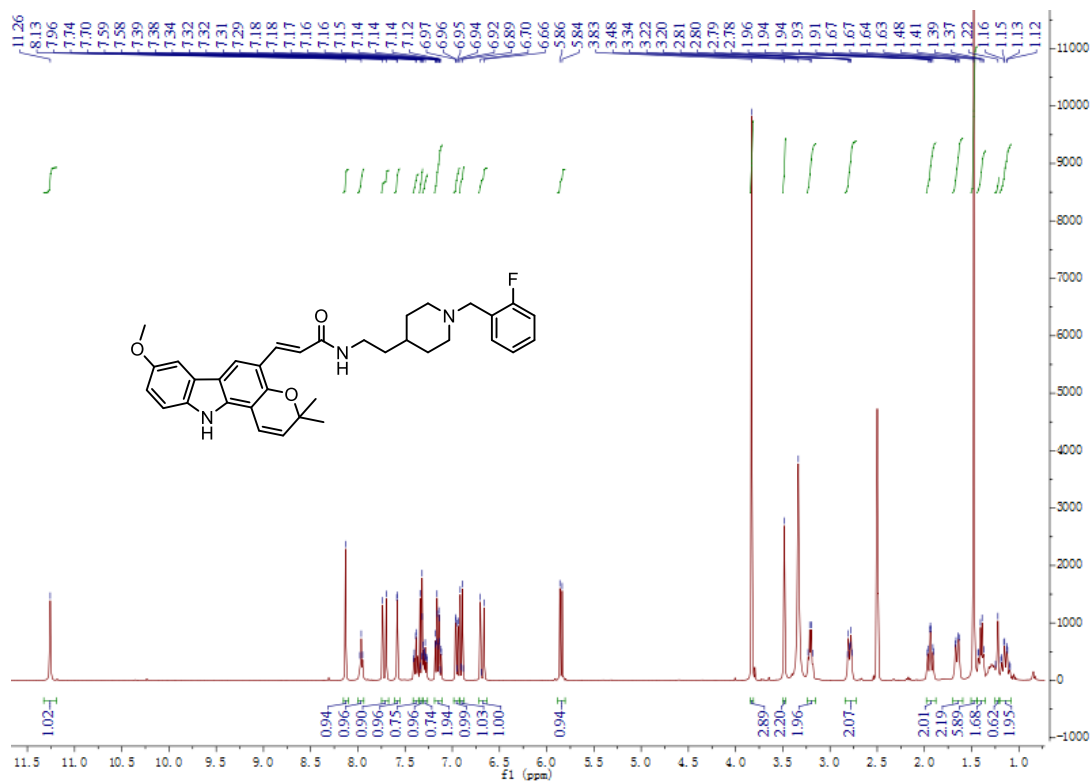

<sup>1</sup>H NMR (DMSO, 600 MHz) Spectrum of Compound 6cf

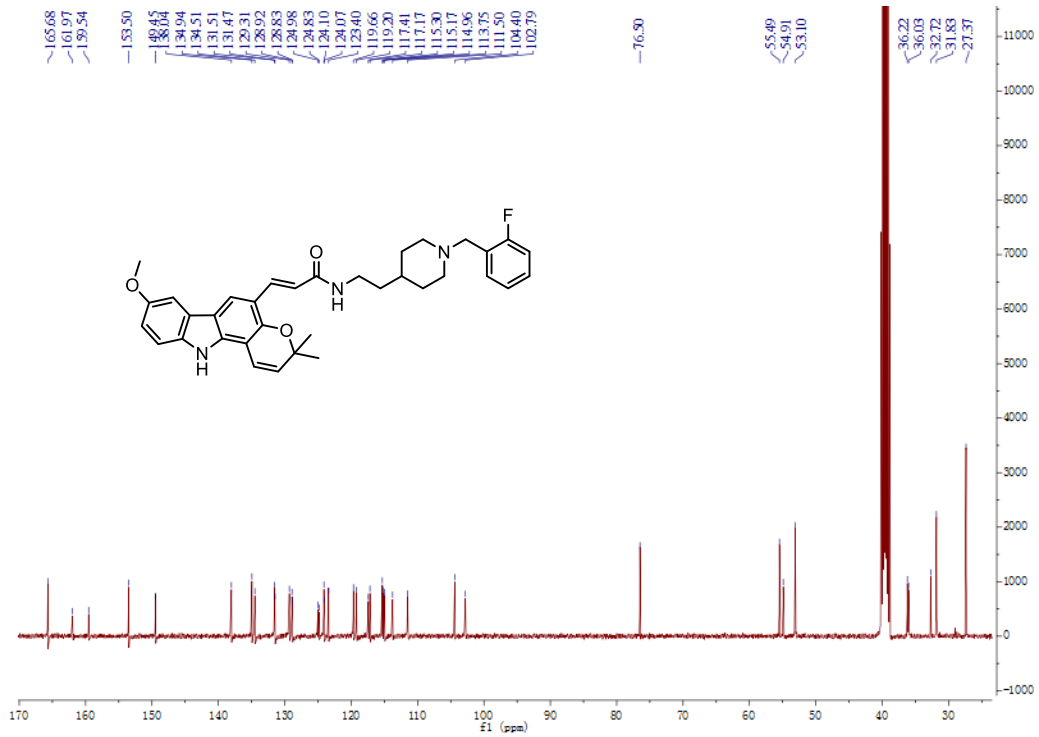

**<sup>13</sup>C NMR (DMSO, 600 MHz) Spectrum of Compound 6cf**

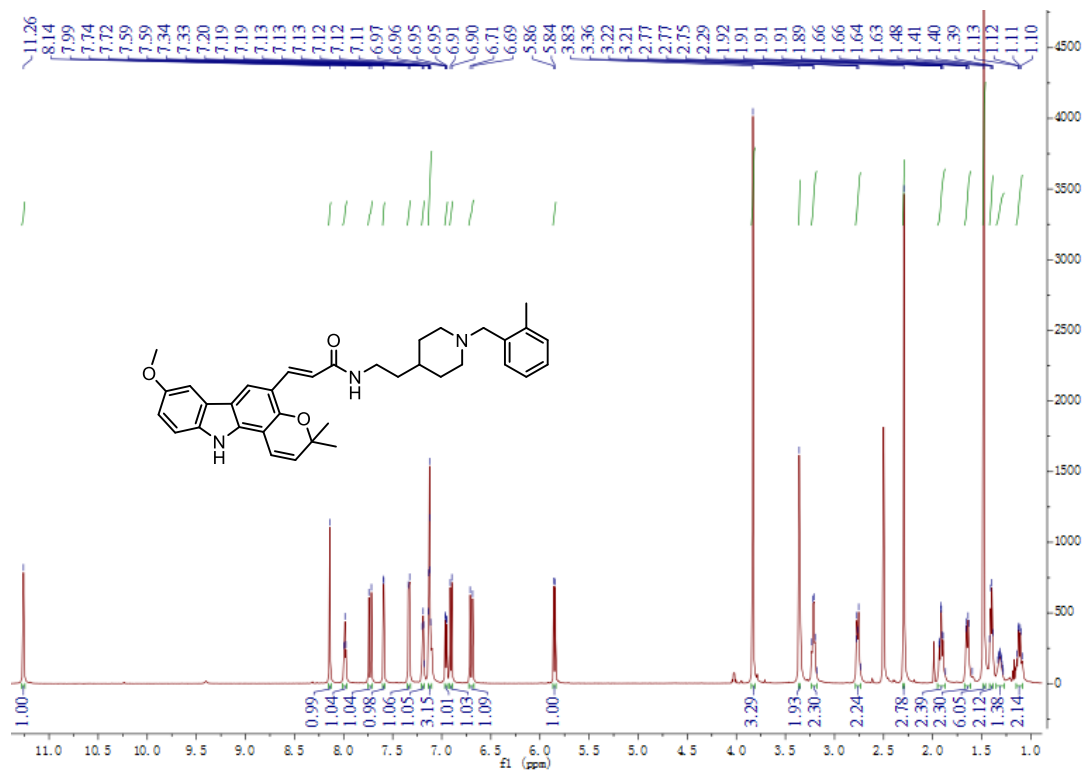

**<sup>1</sup>H NMR (DMSO, 600 MHz) Spectrum of Compound 6cg**

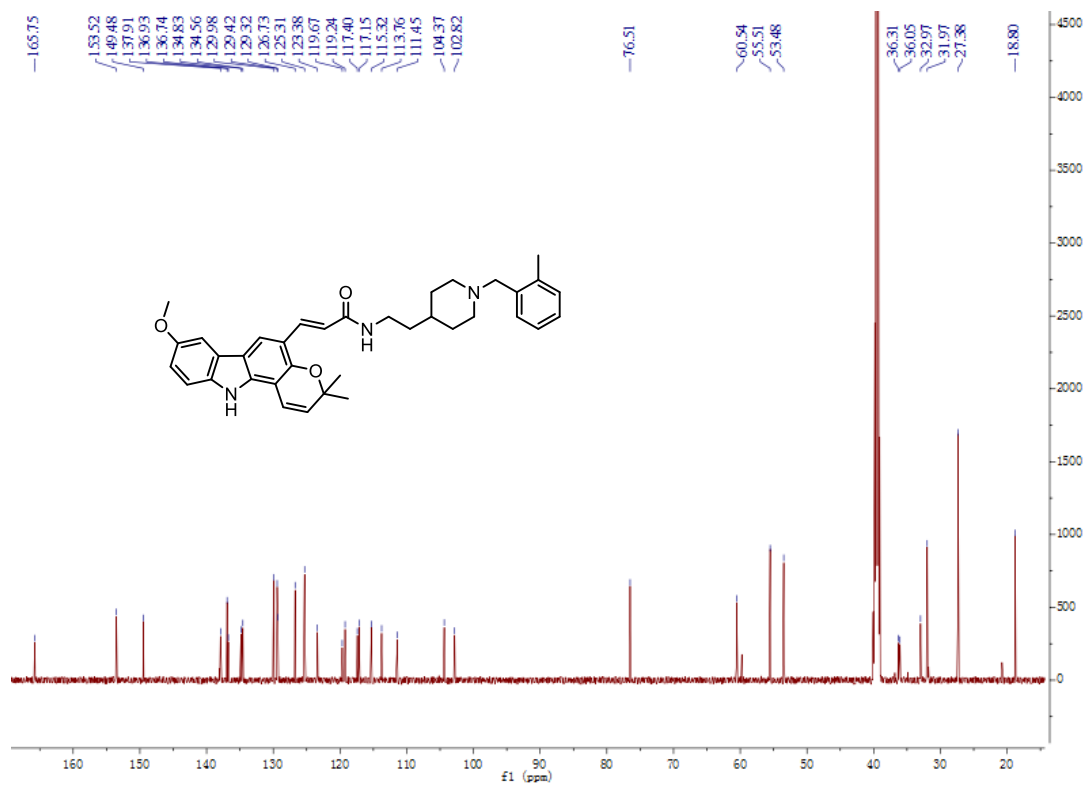

<sup>13</sup>C NMR (DMSO, 600 MHz) Spectrum of Compound 6cg

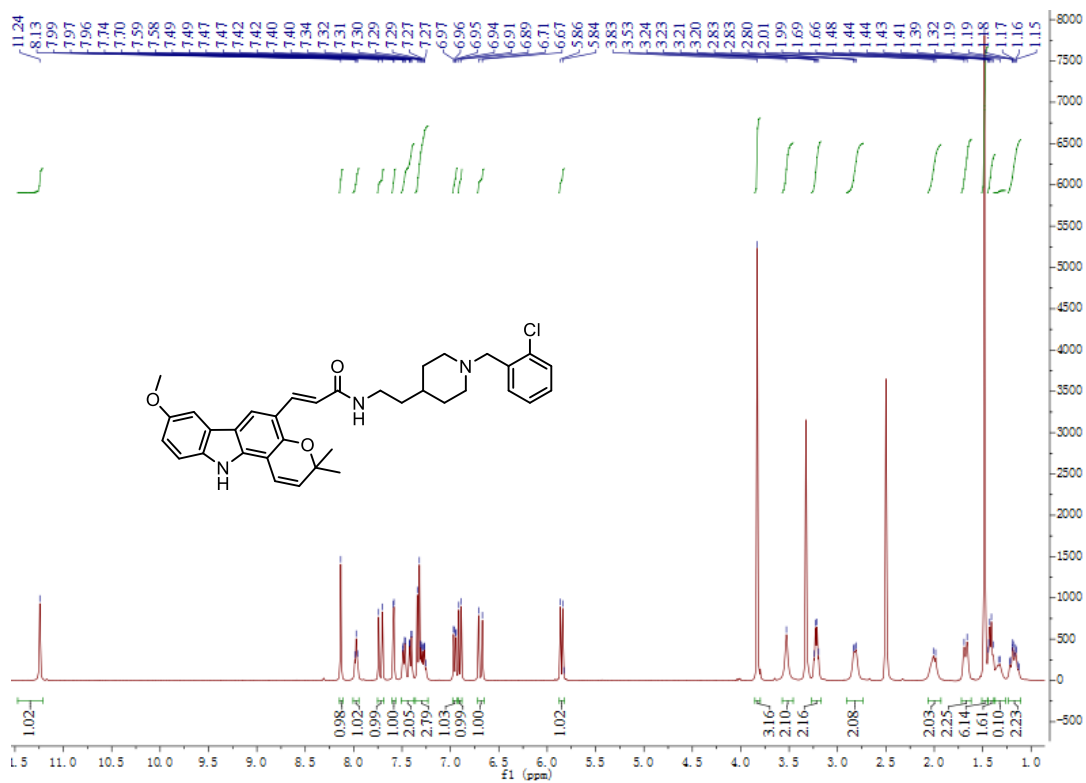

<sup>1</sup>H NMR (DMSO, 600 MHz) Spectrum of Compound 6ch

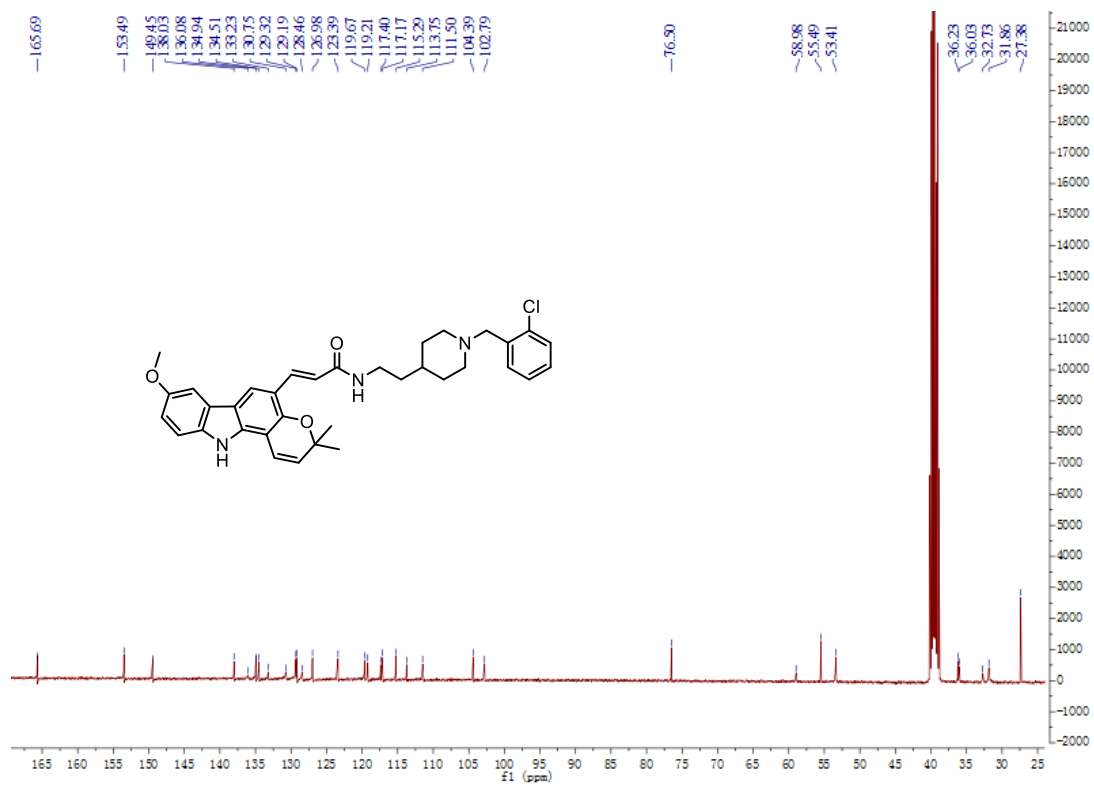

<sup>13</sup>C NMR (DMSO, 600 MHz) Spectrum of Compound 6ch

## 2. HPLC analysis of all final compounds

System: Agilent 1100 Series

Mobile phase: methanol / water

Detector: DAD at 254 nm

Column: YMC C18 column (150 mm×4.6 mm, 5μm)

Flow rate: 1 mL/min

| Compound | Methanol % | Purity | Retention time (min) |
|----------|------------|--------|----------------------|
| 6aa      | 80%        | 99.11% | 6.724                |
| 6ab      | 80%        | 99.68% | 15.023               |
| 6ac      | 90%        | 95.89% | 6.479                |

|            |     |        |        |
|------------|-----|--------|--------|
| <b>6ad</b> | 80% | 98.56% | 17.62  |
| <b>6ae</b> | 85% | 95.28% | 4.726  |
| <b>6af</b> | 85% | 95.90% | 5.379  |
| <b>6ag</b> | 85% | 98.87% | 5.417  |
| <b>6ah</b> | 85% | 97.53% | 10.823 |
| <b>6ba</b> | 85% | 99.70% | 12.342 |
| <b>6bb</b> | 80% | 98.66% | 4.628  |
| <b>6bc</b> | 80% | 99.59% | 6.887  |
| <b>6bd</b> | 80% | 98.94% | 8.25   |
| <b>6be</b> | 85% | 99.21% | 11.41  |
| <b>6bf</b> | 90% | 98.72% | 12.924 |
| <b>6bg</b> | 90% | 99.64% | 14.598 |
| <b>6bh</b> | 85% | 95.41% | 6.744  |
| <b>6bi</b> | 85% | 97.25% | 10.984 |
| <b>6bj</b> | 85% | 98.04% | 13.025 |
| <b>6ca</b> | 85% | 97.05% | 8.074  |
| <b>6cb</b> | 85% | 98.62% | 13.255 |
| <b>6cc</b> | 85% | 97.45% | 15.597 |
| <b>6cd</b> | 85% | 96.27% | 4.759  |
| <b>6ce</b> | 85% | 95.98% | 6.179  |
| <b>6cf</b> | 85% | 95.10% | 6.68   |
| <b>6cg</b> | 85% | 96.23% | 8.576  |
| <b>6ch</b> | 85% | 98.67% | 14.652 |

---
